1  
2  
3  
4  
5  
6  
7  
8  
9  
10  
11  
12  
13  
14  
15  
16  
17  
18  
19  
20  
21  
22  
23  
24  
25  
26  
27  
28

## **The Mettl3 epitranscriptomic writer amplifies p53 stress responses**

Nitin Raj<sup>1</sup>, Mengxiong Wang<sup>1</sup>, Jose A. Seoane<sup>2,3,4</sup>, Nancie A. Moonie<sup>5</sup>, Janos Demeter<sup>5</sup>,  
Alyssa M. Kaiser<sup>1</sup>, Anthony M. Boutelle<sup>1</sup>, Abigail S. Mulligan<sup>1</sup>, Clare Moffatt<sup>1</sup>, Christina  
Curtis<sup>2,3,4</sup>, Howard Y. Chang<sup>6</sup>, Peter. K. Jackson<sup>5,7</sup>, and Laura D. Attardi<sup>1,3\*</sup>

<sup>1</sup>Department of Radiation Oncology, Stanford University School of Medicine, Stanford,  
CA 94305, USA

<sup>2</sup>Department of Medicine, Stanford University School of Medicine, Stanford, CA 94305,  
USA

<sup>3</sup>Department of Genetics, Stanford University School of Medicine, Stanford, CA 94305,  
USA

<sup>4</sup>Stanford Cancer Institute, Stanford University School of Medicine, Stanford, CA 94305,  
USA

<sup>5</sup>Baxter Laboratory, Department of Microbiology & Immunology, Stanford University  
School of Medicine, Stanford, CA 94305, USA

<sup>6</sup>Howard Hughes Medical Institute and Center for Personal Dynamic Regulomes,  
Stanford University School of Medicine, Stanford, CA 94305, USA

<sup>7</sup>Department of Pathology, Stanford University School of Medicine, Stanford, CA 94305,  
USA

\*corresponding author

Correspondence: [attardi@stanford.edu](mailto:attardi@stanford.edu)

29 **SUMMARY**

30

31 The p53 transcription factor, encoded by the most frequently mutated gene in human  
32 cancer, plays a critical role in tissue homeostasis in response to stress signals. The  
33 mechanisms through which p53 promotes downstream tumor suppressive gene  
34 expression programs remain, however, only superficially understood. Here, we used  
35 tandem affinity purification and mass spectrometry to reveal new components of the p53  
36 response. This approach uncovered Mettl3, a component of the m<sup>6</sup>A RNA  
37 methyltransferase complex (MTC), as a p53-interacting protein. Analysis of Mettl3-  
38 deficient cells revealed that Mettl3 promotes p53 protein stabilization and target gene  
39 expression in response to DNA damage. Mettl3 acts in part by competing with the p53  
40 negative regulator, Mdm2, for binding to the p53 transactivation domains to promote  
41 methyltransferase-independent stabilization of p53. In addition, Mettl3 relies on its  
42 catalytic activity to augment p53 responses, with p53 recruiting Mettl3 to p53 target genes  
43 to co-transcriptionally direct m<sup>6</sup>A modification of p53 pathway transcripts to enhance their  
44 expression. Mettl3 also promotes p53 activity downstream of oncogenic signals *in vivo*,  
45 in both allograft and autochthonous lung adenocarcinoma models, suggesting  
46 cooperative action of p53 and Mettl3 in tumor suppression. Accordingly, we found in  
47 diverse human cancers that mutations in MTC components perturb expression of p53  
48 target genes and that MTC mutations are mutually exclusive with *TP53* mutations,  
49 suggesting that the MTC enhances the p53 transcriptional program in human cancer.  
50 Together, these studies reveal a fundamental role for Mettl3 in amplifying p53 signaling  
51 through protein stabilization and epitranscriptome regulation.

52

53 **KEYWORDS**

54 Epitranscriptomics, m<sup>6</sup>A-eCLIP-seq, p53, lung cancer, tumor suppressor, Mettl3,  
55 methyltransferase complex, N(6)-methyladenosine (m<sup>6</sup>A) modification

56

57

## 58 INTRODUCTION

59

60 The *TP53* gene, which encodes the p53 protein, is mutated in over half of all  
61 human cancers, reflecting its fundamental role as a tumor suppressor<sup>1</sup>. p53 is a  
62 transcription factor that integrates cellular stress cues such as DNA damage and  
63 oncogenic signaling to drive anti-proliferative or pro-apoptotic responses important for  
64 tissue homeostasis and tumor suppression<sup>2-4</sup>. p53 activity as a transcriptional activator is  
65 critical for governing gene expression programs that limit tumorigenesis, as evidenced by  
66 the preponderance of *TP53* mutations observed in sequences encoding the DNA binding  
67 domain in human cancers and studies of p53 transactivation dead mutant knock-in mice,  
68 which are highly tumor prone<sup>5,6</sup>. Despite this well-established role for p53 transcriptional  
69 function in tissue homeostasis in response to cellular stresses, however, the mechanisms  
70 through which p53 regulates a downstream expression program remain only superficially  
71 understood. A complete understanding of the mechanisms of p53-regulated gene  
72 expression are of paramount importance for ultimately targeting this critical tumor  
73 suppressor in the clinic<sup>7</sup>.

74 p53 promotes specific gene expression programs through recruitment of the  
75 general transcriptional machinery via cofactors such as mediator subunits and TAFs to  
76 increase levels of transcriptional initiation<sup>8,9</sup>. p53 also recruits histone-modifying  
77 enzymes, including p300, CBP, and PCAF, to acetylate histones and remodel  
78 chromatin<sup>10</sup>. However, the mechanisms by which p53 regulates gene expression beyond  
79 effects on transcriptional initiation remain only superficially understood. Deciphering  
80 additional aspects of p53 activity will provide key insight into p53 function in tissue  
81 homeostasis and cancer suppression.

82 Eukaryotic gene expression is regulated at multiple levels to provide maximal  
83 capacity for fine-tuning in response to various cues such as DNA damage and oncogenic  
84 signaling<sup>11</sup>. The ultimate gene expression profile of a cell can be influenced by modulation  
85 of transcription, RNA metabolism, and protein translation or stability. While RNA  
86 metabolism has been studied at the level of splicing for many years, recent work has  
87 illuminated the importance of RNA modification in regulation of gene expression.  
88 Specifically, N(6)-methyladenosine (m<sup>6</sup>A), the most abundant and prevalent internal

89 modification in eukaryotic mRNAs, is installed on mRNAs co-transcriptionally, primarily  
90 by the Mettl3-Mettl14 methyltransferase writer complex. Depending on the context and  
91 the m<sup>6</sup>A readers expressed in a given setting, m<sup>6</sup>A modification can then affect gene  
92 expression through effects on RNA stability, subcellular localization, and translation.  
93 Importantly, m<sup>6</sup>A modification has been demonstrated to be critical for cell state  
94 transitions, such as during differentiation of stem cells and responses to a variety of stress  
95 signals, such as DNA damage or heat shock<sup>12</sup>. However, the factors that govern which  
96 transcripts are selected for m<sup>6</sup>A modification to drive specific cellular responses remain  
97 enigmatic.

98 Here, we seek to gain new insight into how p53 regulates gene expression  
99 programs in the context of stress signals using tandem affinity purification coupled with  
100 mass spectrometry to identify novel p53-interacting partners. To ensure that p53  
101 pathways remain intact, we perform experiments using untransformed cells, and we  
102 identify the Mettl3 m<sup>6</sup>A RNA-methyltransferase as a p53-interacting protein. Remarkably,  
103 analysis of Mettl3-deficient cells reveals that both p53 stabilization and p53 target gene  
104 induction by either DNA damage or oncogenic signals are significantly compromised by  
105 Mettl3 deficiency. Interestingly, Mettl3 binds to the same region of p53 as the Mdm2  
106 ubiquitin ligase, and therefore effectively competes with Mdm2, thus providing key insight  
107 into how p53 stability is enhanced by Mettl3. Moreover, Mettl3 binding to p53 not only  
108 stabilizes p53 but also co-transcriptionally directs m<sup>6</sup>A modification of downstream  
109 components of the p53 pathway. We find further that Mettl3 not only reinforces p53  
110 function in response to DNA damage but also in tumor suppression, both in mice and  
111 humans. Collectively, these studies reveal a fundamental role for Mettl3 in amplifying p53  
112 signaling both through protein stabilization and epitranscriptome regulation.

113

## 114 **RESULTS**

115

### 116 **Mettl3 interacts with p53 and enhances p53 activity**

117 To identify novel p53-interacting partners, we expressed LAP (Localization and  
118 affinity purification)-tagged p53 in NIH-3T3 fibroblasts and treated cells with the DNA  
119 double strand break-inducer doxorubicin (dox), which triggers p53-dependent G<sub>1</sub> arrest,

120 providing a good model for understanding the biochemical basis for p53 action<sup>13</sup> (data  
121 not shown). After purification and mass spectrometry, we identified Mettl3, the catalytic  
122 component of the core methyltransferase complex that installs *N*6-methyladenosine  
123 (m<sup>6</sup>A) on eukaryotic messenger RNAs (mRNAs), as a p53-interacting partner in both  
124 basal and DNA damage conditions (Fig. 1a, b, Raj et al., in preparation)<sup>12</sup>. We confirmed  
125 the p53-Mettl3 interaction by additional co-immunoprecipitation assays with tagged  
126 variants of the proteins as well as with endogenous proteins in primary mouse embryonic  
127 fibroblasts (MEFs; Fig. 1c, Extended Data Fig. 1a). Through co-immunoprecipitation  
128 assays in fibroblasts, we found further that p53 can also interact with Mettl14, a  
129 heterodimeric partner of Mettl3, suggesting that p53 interacts with the methyltransferase  
130 complex critical for m<sup>6</sup>A RNA modification (Extended Data Fig. 1b)<sup>14,15</sup>. The Mettl3-p53  
131 interaction is not indirectly mediated by DNA, as the interaction is still observed upon  
132 ethidium bromide or DNase treatment (Extended Data Fig. 1c, d).

133 Interestingly, upon co-expression of p53 and Mettl3 in p53-deficient human or  
134 mouse cells, we noted that Mettl3 enhances p53 protein levels, suggesting that Mettl3  
135 might affect p53 function (Fig. 1d, Extended Data Fig. 2a). To test this hypothesis, we  
136 sought to assess the consequences of Mettl3 deficiency for p53 function. We first  
137 leveraged *Mettl3* null embryonic stem (ES) cells and assessed how Mettl3 loss affects  
138 p53 responses to DNA damage<sup>16</sup>. We found that *Mettl3* nullizyosity results in decreased  
139 p53 accumulation in response to DNA damage, which is accompanied by diminished  
140 induction of p53 target genes, indicating that Mettl3 enhances p53 protein accumulation  
141 and transcriptional activity in ES cells (Fig. 1e, f, Extended Data Fig. 2b). To determine  
142 whether this response extends to other cell types, we next examined oncogene-  
143 expressing primary MEFs. Similarly, we noted that p53 accumulation and target gene  
144 induction in response to DNA damage are impaired upon Mettl3 knockdown (Fig. 2a, b).  
145 Collectively, these findings indicate that Mettl3 enforces robust p53 responses to DNA  
146 damage.

147

### 148 **Mettl3 promotes p53 stability through competition with Mdm2**

149 We next investigated the molecular mechanisms by which Mettl3 enhances p53  
150 protein levels. p53 protein has a short half-life resulting from interaction with the Mdm2

151 ubiquitin ligase, which targets p53 for ubiquitin-mediated proteolysis<sup>17,18</sup>. In response to  
152 stress signals, Mdm2 is displaced from p53, resulting in enhanced p53 protein stability  
153 and activation of p53 transcriptional programs<sup>19,20</sup>. We therefore sought first to assess  
154 whether Mettl3 might affect p53 protein stability. We treated ES cells with dox to stabilize  
155 p53, then with cycloheximide to block translation, and interrogated how Mettl3 status  
156 affects p53 half-life. Interestingly, Mettl3 deficiency was characterized by a diminished  
157 p53 half-life, suggesting that Mettl3 acts to enhance p53 protein stabilization (Fig. 3a,  
158 Extended Data Fig. 3). To assess whether the enhanced p53 stabilization by Mettl3  
159 reflects differences in Mdm2 binding, we performed Co-IP experiments to measure the  
160 Mdm2-p53 interaction in the presence and absence of Mettl3. Intriguingly, in the absence  
161 of Mettl3, Mdm2 interacts more strongly with p53 upon DNA damage than when Mettl3 is  
162 expressed (Fig. 3b). These findings suggest that in response to DNA damage, Mdm2 is  
163 efficiently displaced from p53 when Mettl3 is present but not when it is absent.

164 This observation suggested the possibility that Mettl3 and Mdm2 might compete  
165 for binding on p53. We therefore tested whether Mettl3 binds to the same region of p53  
166 as Mdm2. Mdm2 binds to the p53 amino-terminus, where the two p53 transcriptional  
167 activation domains (TADs) reside between residues 1-80. The interaction of Mdm2 with  
168 p53 is in fact disrupted by mutations in the two TADs at residues L25,Q26 in TAD1 and  
169 F53,F54 in TAD2<sup>10,21</sup>. Notably, the ability of Mettl3 to bind to p53 is reduced by ~50% in  
170 the p53<sup>L25Q,Q26S,F53Q,F54S</sup> mutant (Fig. 3c). Moreover, deletion of both p53 TADs virtually  
171 abolished the interaction with Mettl3 (Fig. 3d). These observations suggest that Mettl3  
172 binds to the p53 TADs and support the idea that Mettl3 stabilizes p53 by hindering Mdm2  
173 binding. If so, then the effects of Mettl3 on p53 might be expected to be at least partially  
174 independent of its catalytic activity. To test this hypothesis, we used a Mettl3 catalytic  
175 mutant (Mettl3<sup>D395A,W398A</sup>) that lacks m<sup>6</sup>A methyltransferase activity<sup>22</sup>. Indeed, co-  
176 expression of this catalytically-dead Mettl3 mutant with p53 results in efficient  
177 enhancement of p53 stabilization, albeit somewhat less than with wild-type Mettl3 (Fig.  
178 3e). Together, these findings reveal that Mettl3 plays a catalytic activity-independent role  
179 to stabilize p53 but also suggest that Mettl3 might exert a catalytic activity-dependent role  
180 in augmenting the p53 pathway.

181

## 182 **Mettl3 promotes m<sup>6</sup>A modification of p53 pathway transcripts**

183 To interrogate the catalytic activity-dependent role of Mettl3 in the p53 pathway,  
184 we performed m<sup>6</sup>A-eCLIP-seq to identify those Mettl3-dependent m<sup>6</sup>A RNA modifications  
185 occurring after a stress signal. We utilized oncogene-expressing fibroblasts expressing  
186 control shRNAs or shRNAs directed against Mettl3 to acutely knockdown Mettl3, and we  
187 either left cells untreated or treated 6 hours with dox before performing m<sup>6</sup>A-eCLIP-seq  
188 (Fig. 4a, b). We first queried the site of m<sup>6</sup>A modifications in each condition and found  
189 that m<sup>6</sup>A modifications mapped primarily to the classical DRACH motif and were  
190 predominantly localized to the 3' UTR or last exon of the coding sequence of mRNAs  
191 (Fig. 4c, d, Extended Data Fig. 4a, b). We next characterized the transcripts displaying  
192 Mettl3-dependent m<sup>6</sup>A modification in the presence of DNA damage when p53 function  
193 is maximal. After careful normalization of m<sup>6</sup>A IP signal to input to ensure analysis of  
194 differences in m<sup>6</sup>A modification between samples, functional annotation analysis of the  
195 transcripts with enhanced Mettl3-dependent m<sup>6</sup>A modification under DNA damaging  
196 agent conditions revealed p53-bound and p53-regulated transcripts as among the top  
197 identified categories (Fig. 4e). The overlap between the genes that undergo Mettl3-  
198 dependent m<sup>6</sup>A modification under DNA damage conditions and genes found previously  
199 to be bound and regulated by p53 upon DNA damage in MEFs<sup>23</sup> was statistically  
200 significant (Fisher exact test,  $P=5.9e-016$ ). The numerous p53 target gene transcripts with  
201 Mettl3-dependent m<sup>6</sup>A modification upon DNA damaging agent treatment included  
202 *Trp53inp1*, *Mdm2*, *Ccng1* and *Pmaip (Noxa)* (Fig 4f, g). In contrast, no clear Mettl3-  
203 dependent m<sup>6</sup>A modification was detected for the *p53* transcript itself upon treating with  
204 DNA damage (data not shown).

205 The Mettl3-dependent modification of myriad p53 target gene transcripts upon  
206 DNA damage suggests that the p53-Mettl3 interaction augments the p53-driven gene  
207 expression program in part through co-transcriptional installation of m<sup>6</sup>A on transcripts.  
208 To elucidate the mechanism underlying this effect of Mettl3, we examined whether Mettl3  
209 might associate with chromatin at p53 target genes. Using ChIP assays in MEFs, we  
210 found that Mettl3 associates with the p53 binding sites of p53 target genes, including  
211 *Mdm2* and *Noxa*, suggesting that Mettl3 can associate with chromatin of p53 target genes  
212 to direct m<sup>6</sup>A modification (Fig. 5a). This interaction is diminished in the absence of p53,

213 underscoring the importance of p53 for Mettl3 recruitment to these sites (Fig. 5b).  
214 Together, these findings suggest that the Mettl3 complex installs m<sup>6</sup>A marks on select  
215 p53-regulated mRNAs co-transcriptionally. Analysis of the *Noxa* 3'UTR fused to a  
216 heterologous luciferase reporter revealed that Mettl3 promotes reporter expression,  
217 suggesting that m<sup>6</sup>A modification has the potential to enhance expression of p53 pathway  
218 transcripts (Fig. 5c, d). Overall, our findings suggest that Mettl3 exerts a dual effect on  
219 p53, through both stabilization of p53 and through modification of various transcripts in  
220 the p53 pathway to enhance their expression.

221

### 222 **Mettl3 supports p53 in tumor suppression**

223 In addition to serving as a key sentinel to genotoxic damage, p53 plays a critical  
224 role in responses to oncogenic signals, as underscored by its frequent mutation in human  
225 cancer<sup>2</sup>. In response to oncogene expression, p53 suppresses transformation *in vitro* and  
226 tumorigenesis *in vivo*. To determine whether Mettl3 might also contribute to p53 tumor  
227 suppressive function, we first utilized oncogene-expressing MEFs, a classical  
228 transformation model in which p53 potently suppresses transformation<sup>24</sup>. We knocked-  
229 down Mettl3 expression in oncogene-expressing MEFs using shRNAs. Analysis of these  
230 cells revealed that attenuated Mettl3 expression enhanced their clonogenic potential, a  
231 cardinal feature of transformed cells, supporting a role for Mettl3 in suppressing  
232 transformation (Fig. 6a). In contrast, Mettl3 knockdown in oncogene expressing *p53* null  
233 cells did not enhance clonogenic potential, indicating that the role for Mettl3 in  
234 transformation suppression is specifically in the context of intact p53 (Fig. 6b, Extended  
235 Data Fig. 5a). Interestingly, robust Mettl3 knockdown even appeared deleterious for  
236 viability in the absence of p53. We next assessed the consequences of Mettl3 knockdown  
237 for tumor growth by subcutaneous injection of oncogene-expressing cells into  
238 immunocompromised mice. Tumor growth in this context is significantly enhanced by p53  
239 deficiency<sup>25</sup>, and, similarly, Mettl3 knockdown dramatically enhances tumor growth *in*  
240 *vivo*, suggesting a role for Mettl3 in tumor suppression (Fig. 6c). To more broadly assess  
241 the impact of Mettl3 deficiency on cancer development, we employed an autochthonous  
242 mouse lung adenocarcinoma model in which we could perform targeted gene inactivation  
243 using CRISPR/Cas9-mediated gene editing. In this model, lentiviral-Cre instillation



244 induces oncogenic Kras, Cas9, and tdTomato expression as well as delivering sgRNAs  
245 targeting *Mettl3* or a non-targeting control sgRNA. Importantly, p53 deficiency in this  
246 model is known to enhance tumor growth<sup>24</sup>. Interestingly, combined *Mettl3* ablation by  
247 CRISPR/Cas9 and Kras activation resulted in enhanced lung adenocarcinoma growth  
248 relative to control mice (Fig. 6d, Extended Data Fig. 5b). Together, these findings suggest  
249 that *Mettl3* has tumor suppressor activity in lung adenocarcinoma *in vivo*, in which p53  
250 has an established role in suppressing cancer.

251 We next sought to interrogate the importance of a p53/methyltransferase axis in  
252 tumor suppression in human cancer. *METTL3* is part of a multi-protein methyltransferase  
253 complex (MTC) that not only includes *METTL14*, but also WTAP, RBM15, RBM15b,  
254 *VIRMA*, *CBLL1*, and *ZC3H13*<sup>26</sup>. We thus sought to identify point mutations and deletions  
255 in *METTL3* complex components in human cancers and assess whether there is a  
256 mutually exclusive relationship with *TP53* mutations. Indeed, examination of the  
257 mutational spectrum in the full complement of MTC components in various carcinomas,  
258 including lung adenocarcinoma, breast, ovarian, and head and neck cancers, revealed a  
259 mutually exclusive pattern of mutations with *TP53*, suggesting that when constituents of  
260 the MTC are mutated, there is less selective pressure to mutate *TP53* (Figure 7a,  
261 Extended Data Fig. 6). We found further that like *TP53* mutation, MTC mutations  
262 compromise expression of various p53 target genes in a range of human cancer types,  
263 albeit not to the full extent seen with *TP53* mutation (Fig. 7b, Extended Data Fig. 7a).  
264 These data suggest that the MTC augments the p53 transcriptional program in humans.  
265 To test the functional significance of MTC activity in the p53 pathway, we leveraged  
266 DepMap data to assess the impact of *METTL3* knockout on proliferation of human cancer  
267 cell lines of different *TP53* status. Notably, we found that the most statistically significant  
268 *METTL3* co-dependency with all genes was with *TP53* (Extended Data Fig. 7b).  
269 Moreover, the highest Pearson correlation between Achilles scores with *METTL3* and  
270 *METTL14* knockout includes not only other MTC components, as expected, but also *TP53*  
271 and other positive regulators of the p53 pathway, *TP53BP1* and *ATM*, further supporting  
272 the idea that the MTC is a component of the p53 pathway (Fig. 7c, Extended Data Fig. 7c).  
273 Conversely, both *METTL3* and *METTL14* showed a negative correlation with *MDM2*, as  
274 expected for a negative regulator of p53. Interestingly, the Achilles score for *METTL3* is

275 significantly lower in *TP53* mutant cell lines than in cell lines harboring wild-type *TP53*  
276 (Extended Data Fig. 7d), reminiscent of the reduced proliferation seen in oncogene-  
277 expressing, p53-deficient MEFs upon *Mettl3* knockdown (Fig. 6b). Collectively, our  
278 findings support the idea that the METTL3 MTC and p53 operate in a common tumor  
279 suppressive pathway in various human cancers, with the MTC acting to promote full p53  
280 activity.

## 281 **DISCUSSION**

282 Here, we show that the *Mettl3* complex plays a fundamental role in augmenting  
283 p53 activity at two levels: by binding to p53 to enhance its half-life through a catalytic  
284 activity-independent mechanism and by coordinating the m<sup>6</sup>A modification of p53 target  
285 gene transcripts in acute DNA damage responses and in tumor suppression to ensure  
286 their potent expression (Fig. 7d). This capacity ensures that a robust p53 response can  
287 be induced, and provides the potential for fine-tuning p53 activity.

288 Recruitment of the MTC by p53 and other sequence-specific transcription factors  
289 allows for co-transcriptional m<sup>6</sup>A modification that can provide an additional level of  
290 regulation for gene expression programs. A role for *Mettl3* and the MTC in increasing  
291 activity of sequence-specific transcription factors has been reported, albeit through  
292 distinct mechanisms. For example, in AML, *Mettl3* is recruited by the CEBPZ transcription  
293 factor to the promoters of oncogenes to drive m<sup>6</sup>A modification of emerging transcripts, a  
294 signal that ultimately augments translation of these transcripts to sustain AML cells<sup>27</sup>. In  
295 human pluripotent stem cells, in response to differentiation cues, the SMAD2/3  
296 transcription factors recruit the MTC to RNAs to facilitate co-transcriptional m<sup>6</sup>A  
297 modification, leading to destabilization of specific transcripts such as *Nanog* to drive exit  
298 from pluripotency and promote differentiation<sup>28</sup>. Recruitment of the MTC to actively  
299 expressed genes in ES cells can also occur through *Mettl14* binding to H3K36me3, a  
300 mark of transcription elongation, to drive co-transcriptional m<sup>6</sup>A modification of nascent  
301 mRNAs, also leading to destabilization of pluripotency gene mRNAs<sup>29</sup>. Thus, *Mettl3* can  
302 be recruited to DNA by transcriptional regulators to promote m<sup>6</sup>A modification. Similarly,  
303 our findings suggest that *Mettl3* is recruited to p53-bound sites in chromatin to co-  
304 transcriptionally install m<sup>6</sup>A marks on p53 target gene messages. Recruitment of the MTC  
305  
306

307 by specific transcription factors may help to explain which transcripts are selected for m<sup>6</sup>A  
308 modification in a given setting, a point that has remained enigmatic.

309 m<sup>6</sup>A modification on RNA by writers like the MTC affects gene expression through  
310 a variety of mechanisms mediated by different m<sup>6</sup>A reader proteins<sup>12</sup>. While m<sup>6</sup>A marks  
311 can be read by YTHDF2/3 reader proteins to trigger mRNA destabilization, they can also  
312 be recognized by IGF2BP1-3 to promote mRNA stabilization<sup>30-33</sup>. m<sup>6</sup>A modification can  
313 also be recognized by the YTHDC1 nuclear reader to regulate splicing and RNA export<sup>34</sup>.  
314 In addition, m<sup>6</sup>A can affect translation through diverse mechanisms<sup>12</sup>. For example,  
315 Mettl3-driven m<sup>6</sup>A modification on the 5'UTR triggers binding to multiple subunits of the  
316 eukaryotic initiation factor 3 (eIF3) complex to promote cap-independent translation, while  
317 m<sup>6</sup>A marks in the CDS and 3'UTR results in YTHDF1/3 and eIF3 recruitment to promote  
318 translation initiation<sup>32,35,36</sup>. Interestingly, Mettl3 also promotes translation by acting as a  
319 reader: it can bind to an m<sup>6</sup>A mark in the 3' UTR and interact with translation initiation  
320 machinery components such as eIF3H at the 5' end of the transcript via RNA  
321 circularization, thus leading to enhanced translation of m<sup>6</sup>A modified mRNAs<sup>37,38</sup>. In this  
322 capacity, Mettl3 catalytic activity is dispensable.

323 The Mettl3 complex is critical for responses to extracellular cues, either to promote  
324 cell fate transitions or homeostasis. For example, Mettl3 is required in mouse and human  
325 ES cells to restrict self-renewal and promote differentiation through downregulation of  
326 core pluripotency factor transcripts such as *Nanog*<sup>16</sup>. Similarly, Mettl3-mediated m<sup>6</sup>A  
327 modification in human hematopoietic stem cells is critical for differentiation *in vivo* and for  
328 inhibiting self-renewal in glioblastoma stem cells<sup>39,40</sup>. Intriguingly, several studies have  
329 established a similar role of p53 in opposing stemness and promoting differentiation: p53  
330 loss in mice triggers an expansion of both normal and cancer stem cells, and p53 restricts  
331 cellular reprogramming in iPS cell generation<sup>41,42</sup>. Beyond modulating cell state, Mettl3  
332 can also ensure homeostasis by promoting resolution to cellular stress. For example, in  
333 response to UV, Mettl3/Mettl14 localizes to DNA damage sites to transiently induce m<sup>6</sup>A  
334 RNA modification and promote DNA repair through recruitment of DNA polymerase<sup>43</sup>.  
335 Mettl3 also plays a critical role in the resolution of heat shock responses by inducing m<sup>6</sup>A  
336 modification on *Hsp70* mRNA, leading to its destabilization<sup>44</sup>. Our findings similarly

337 underscore the importance of Mettl3 in promoting responses to signals, specifically for  
338 ensuring a robust p53 response to DNA damage or oncogene expression.

339 m<sup>6</sup>A modification and the MTC have a highly context-dependent role in cancer<sup>45</sup>.  
340 While Mettl3 has been reported to be an oncogene in numerous cancers such as AML,  
341 colon cancer, NSCLC, bladder cancer and ovarian cancer<sup>27,45,46</sup>, it has been shown to be  
342 a tumor suppressor in other settings, such as renal cell carcinoma and endometrial  
343 cancer<sup>47,48</sup>. Similarly, Mett14 has been reported to promote some cancer types yet  
344 perform a tumor suppressive role in HCC and GBM<sup>39,45</sup>. Our findings suggest that the  
345 MTC can be tumor suppressive in the context of intact p53, where it bolsters p53 activity.  
346 Interestingly, our clonogenic assays suggest that Mettl3 may support tumor growth in the  
347 absence of p53, as knockdown is detrimental for cell growth in this context. This difference  
348 in Mettl3 action in the context of active or deficient p53 provides one potential explanation  
349 for observed differences in the role of the MTC in cancer development. In addition, many  
350 studies of the MTC in cancer have relied on subcutaneous tumor xenograft studies in  
351 immunodeficient mice. It will be important to refine our understanding of the role of the  
352 MTC in cancer as performed here and in a previous AML study<sup>49</sup> using autochthonous  
353 mouse models, which better mimic cancer initiation and progression in the context of an  
354 intact immune system and host stroma. Understanding the precise contexts in which  
355 Mettl3 must function to promote or suppress tumor development will be critical for better  
356 understanding pathways to tumorigenesis and for ultimately designing therapeutic  
357 interventions based on this pathway.

358

## 359 **FIGURE LEGENDS**

360

361 **Fig. 1 | Mettl3 interacts with p53 and enhances p53 transcriptional activity in DNA-**  
362 **damage treated cells. a,** Schematic of dual-affinity purification of LAP-tagged p53  
363 protein in Flp-In-3T3 fibroblasts. Cells were either left untreated or treated with 0.2 µg/mL  
364 doxorubicin (dox) for 6 hours, followed by dual affinity purification of p53-bound protein  
365 complexes and protein identification by LC-MS/MS. **b,** Co-immunoprecipitation (Co-IP)  
366 and immunoblot assay to validate p53-LAP and endogenous Mettl3 interaction in  
367 untreated and DNA damage treated Flp-In-3T3 cells. Numbers underneath indicate the

368 amount of p53 co-precipitated relative to Mettl3 ( $n=3$ ). **c**, Co-IP and immunoblot assay to  
369 examine interaction of endogenous Mettl3 and p53 in *E1A;HRasV12*-expressing MEFs  
370 ( $n=2$ ). **d**, Immunoblot after transfection of Flag-Mettl3 and HA-p53 plasmids into H1299  
371 cells ( $n=3$ ). **e**, p53 induction after 6 hours dox (0.2  $\mu\text{g}/\text{mL}$ ) in wild-type and two different  
372 *Mettl3*<sup>-/-</sup> ES cell lines. Numbers underneath indicate the amount of p53 relative to Gapdh  
373 loading control ( $n=3$ ). **f**, Induction of p53 target genes after 6 hours dox (0.2  $\mu\text{g}/\text{mL}$ ) in  
374 *Mettl3*<sup>-/-</sup> ES cells relative to wild-type cells, normalized to  $\beta$ -Actin. *Mettl3*<sup>-/-</sup> depicts mean  
375 of two different *Mettl3* knockout cell lines. Data are mean  $\pm$  s.e.m. of at least three  
376 biological replicates each with three technical replicates. *P* values were determined by  
377 the unpaired two-tailed Student's *t*-test. \* $P<0.05$ , \*\* $P<0.01$ . Representative immunoblots  
378 are shown in **b,c,d** and **e**, and Gapdh serves as a loading control.  
379

380 **Fig. 2 | Mettl3 knockdown impairs p53 accumulation and target gene induction in**  
381 **response to DNA damage in oncogene-expressing primary MEFs.** **a**, Immunoblots of  
382 *E1A;HRasV12*-expressing MEFs showing protein levels of p53 and Mettl3 in shLuc and  
383 shMettl3 shRNA-expressing cell lines. Gapdh serves as loading control. Representative  
384 immunoblots are shown from three biological replicates, and two different MEF lines per  
385 genotype were used for this experiment. The numbers indicate the p53 levels after  
386 normalization to Gapdh. **b**, qRT-PCR analysis of expression of p53 target genes after 6  
387 hours dox (0.2  $\mu\text{g}/\text{mL}$ ) in shLuc and shMettl3 shRNA-expressing cell lines, normalized to  
388  $\beta$ -Actin. shMettl3 depicts mean of cell lines expressing either of two different shRNAs  
389 targeting Mettl3. Representative data are shown from two biological replicates each with  
390 three technical replicates and two different MEF lines per genotype were used. Data are  
391 mean of fold induction (Ratio of dox treated / untreated)  $\pm$  s.e.m. *P* values were  
392 determined by the unpaired two-tailed Student's *t*-test. \* $P<0.05$ , \*\* $P<0.01$ , \*\*\* $P<0.001$ .

393  
394 **Fig. 3 | Mettl3 enhances p53 protein half-life by displacing Mdm2.** **a**, Time course  
395 analysis of p53 levels, normalized to Gapdh, in wild-type (WT) and *Mettl3*<sup>-/-</sup> (KO) mouse  
396 ES cells after treatment with 0.2  $\mu\text{g}/\text{mL}$  doxorubicin (dox) and cycloheximide (CHX) ( $n=2$ ).  
397 **b**, Co-immunoprecipitation and immunoblot assays in *E1A;HRasV12*-expressing MEFs  
398 to assess Mdm2 pull-down with p53, in *E1A;HRasV12*-expressing MEFs expressing

399 control shLuc or shMettl3 RNAs, under basal and DNA-damage conditions [6 hours dox  
400 (0.2  $\mu\text{g}/\text{mL}$ )]. Representative immunoblots are shown from four biological replicates and  
401 two different MEF lines per genotype were used. Gapdh serves as a loading control. **c**,  
402 Co-immunoprecipitation and immunoblot assays in Flp-In-3T3  $p53^{-/-}$  cells to assess pull-  
403 down of HA-p53 wild-type or transcriptionally-dead HA-p53<sup>25,26,53,54</sup> (schematized at top)  
404 with Flag-Mettl3. Numbers indicate the amount of HA-p53 co-immunoprecipitated relative  
405 to Flag-Mettl3 ( $n=3$ ). **d**, Co-immunoprecipitation and immunoblot assays in Flp-In-3T3  
406  $p53^{-/-}$  cells to assess pull-down of HA-p53 wild-type or HA-p53 deletion mutants  
407 schematized at top with Flag-Mettl3. Numbers indicate the amount of HA-p53 co-  
408 immunoprecipitated relative to Flag-Mettl3 ( $n=3$ ). **e**, (Left) Immunoblot analysis to assess  
409 p53 levels upon co-transfection of HA-p53 and empty vector, Flag-Mettl3 (WT) or  
410 catalytically inactive Flag-Mettl3 (APPA) into  $p53^{-/-}$  Flp-In-3T3 cells. Gapdh serves as a  
411 loading control. (Right) Quantitation of HA-p53 levels relative to Gapdh. Representative  
412 immunoblots are shown in **c,d**, and **e**.

413

414 **Fig. 4 | Mettl3-mediated m<sup>6</sup>A modification regulates p53 signaling pathway.** **a**,  
415 *E1A;HRasV12*-expressing wild-type MEFs transduced with shLuc or shMettl3 hairpins  
416 were either left untreated or treated with 0.2  $\mu\text{g}/\text{mL}$  doxorubicin (dox) for 6 hours followed  
417 by m<sup>6</sup>A-eCLIP-seq and RNA-seq analysis. **b**, Immunoblots showing p53 and Mettl3  
418 protein levels in shLuc and shMettl3 shRNA-expressing cell lines. Gapdh serves as a  
419 loading control. Representative immunoblots are shown from three biological replicates,  
420 and two different MEF lines per genotype were used for this experiment. **c**, Identification  
421 of the known consensus m<sup>6</sup>A DRACH motif in mRNAs displaying m<sup>6</sup>A modification in the  
422 presence of DNA damage, by performing *de novo* motif search with HOMER database.  
423 **d**, Pie chart of the distribution of m<sup>6</sup>A peaks enriched upon DNA damage. m<sup>6</sup>A-IP reads  
424 were normalized to the total number of reads covering the m<sup>6</sup>A residue in the input  
425 sample. **e**, Functional annotation analysis of Mettl3-dependent m<sup>6</sup>A peaks enriched upon  
426 DNA-damage using Enrichr (N=number of genes per term). **f**, Table of p53 pathway  
427 transcripts with Mettl3-dependent m<sup>6</sup>A modification under acute DNA damage showing  
428 major site of modification, *p*-values and log<sub>2</sub> fold change for enriched m<sup>6</sup>A peaks. **g**,  
429 UCSC genome browser tracks showing RPM (reads per million) patterns of m<sup>6</sup>A-eCLIP-

430 seq in *Trp53inp1*, *Noxa*, *Fas* and *Tex15* mRNAs in untreated or doxorubicin-treated  
431 *E1A;HRasV12* MEFs transduced with either shLuc or shMettl3 RNAs.

432  
433 **Fig. 5 | Mettl3 associates with chromatin of p53 target genes and enhances**  
434 **expression of Noxa.** **a**, ChIP analysis of Mettl3 binding to p53 sites in p53 target gene  
435 loci, relative to input, in dox-treated *E1A;HRasV12* MEFs. IgG serves as a negative  
436 control antibody. Representative analysis from two biological replicates. **b**, ChIP analysis  
437 of Mettl3 binding to p53 sites in p53 target gene loci, relative to input, in dox-treated  
438 *E1A;HRasV12* wild-type and *p53*<sup>-/-</sup> MEFs. Representative analysis from two biological  
439 replicates. IgG serves as a negative control antibody, **c**, (Top) Reporter constructs  
440 expressing Firefly luciferase (Fluc) without and with the *Noxa* 3'UTR. (Bottom) Mean  $\pm$   
441 s.e.m of Fluc reporter activities in Flp-In 3T3 *Mettl3*<sup>-/-</sup> cells, transfected with empty vector  
442 or Flag-Mettl3 vector, after normalization to Renilla luciferase expression and  
443 subsequently to pGL3-empty without Mettl3 (n=3). *P* values were determined by  
444 unpaired, two-tailed Student's *t*-test. \*\**P*<0.01, ns = not significant. **d**. Representative  
445 immunoblot showing Flag-Mettl3 protein levels in Flp-In 3T3 *Mettl3*<sup>-/-</sup> cells. Gapdh serves  
446 as a loading control (n=2).

447  
448 **Fig. 6 | Mettl3 supports p53-mediated tumor suppression in mice.** **a,b** Low density  
449 plating assay to assess clonogenic potential of *E1A;HRasV12*-expressing wild-type MEFs  
450 **(a)** or *p53*<sup>-/-</sup> MEFs **(b)** transduced with either shLuc or shMettl3 RNAs. (Left) Crystal violet  
451 was used to stain the colonies. Representative crystal-violet stained wells are shown.  
452 (Right) Average colony number (for *p53*<sup>WT</sup> MEFs, n=4, with triplicate samples, using two  
453 different MEF lines per genotype, for *p53*<sup>-/-</sup> MEFs, n=2 with triplicate samples). **c**, Average  
454 weight of *E1A;HRasV12* MEF tumors after growth *in vivo* for 32 days. Two different MEF  
455 lines were used. In **a,b,c** bar shows mean  $\pm$  s.e.m. **d**, Lentiviral vectors expressing Cre  
456 recombinase and Mettl3 or control sgRNA were delivered intratracheally into *KT; H11<sup>LSL-</sup>*  
457 *Cas9* mice and tumor size of all lung tumors was assessed after 20 weeks (n=12 mice per  
458 group; n=907 control and 826 sgMettl3 tumors). Graph shows top 10% of all tumors in  
459 each group. Bar shows the mean for each group. *P* values were determined by unpaired,  
460 two-tailed Student's *t*-test \*\**P*<0.01, \*\*\**P*<0.001, ns = not significant.

461  
462 **Fig. 7| Mettl3 MTC and p53 operate in a common tumor suppressive pathway in**  
463 **human cancers. a**, Oncoplot showing alteration frequencies of *TP53* and *METTL3*  
464 methyltransferase complex (MTC) components in human LUAD. *TP53.tr* refers to  
465 truncation mutations while *TP53.ms* refers to missense mutations in *TP53*. *P* value shows  
466 significance of DISCOVERY test unadjusted and adjusted for multiple testing. **b**,  
467 Differential expression (DE) analysis of *TP53* target genes in human cancers. Dots  
468 represent log fold change expression of select p53 targets in MTC mutant vs wild-type  
469 and *TP53* truncation mutant vs wild-type tumors. Summary represents DE in 33 TCGA  
470 cancer types. **c**, Density distribution of Pearson correlations between *METTL3* Achilles  
471 scores. Horizontal lines represent genes of interest including MTC components, *TP53*,  
472 and regulators of p53 pathway. Red bars represent the 5<sup>th</sup> and 95<sup>th</sup> quantiles of the  
473 distribution. **d**, Proposed model of Mettl3-MTC regulation of the p53 pathway to potentiate  
474 full p53 responses to stress signals. In response to stress signals, Mettl3 stabilizes p53  
475 protein in a m<sup>6</sup>A catalysis-independent manner by displacement of Mdm2 from p53  
476 protein (i), and Mettl3 regulates the expression of select p53 pathway transcripts by  
477 governing their m<sup>6</sup>A-modification (ii).

478  
479 **Extended Data Fig. 1| p53 interacts with Mettl3-Mettl14 methyltransferase complex**  
480 **independent of DNA. a**, Flp-In-3T3 *p53*<sup>-/-</sup> cells were co-transfected with Flag-Mettl3 and  
481 HA-p53, and the cell lysates were immunoprecipitated with anti-Flag M2 magnetic beads  
482 and detected by immunoblotting with the indicated antibodies (*n*=2). **b**, Co-IP and  
483 immunoblot assay to test interaction between endogenous p53 and Mettl14 in  
484 *E1A;HRasV12*-expressing MEFs. Flag antibody serves as non-specific antibody (*n*=2). **c**,  
485 Co-IP and immunoblot assay to test the nucleic acid dependence of interaction between  
486 endogenous p53 and Mettl3 in *E1A;HRasV12*-expressing MEFs. Lysates were pre-  
487 treated with ethidium bromide (EtBr) at 10 μg/ml prior to immunoprecipitations (*n*=2). **d**,  
488 Co-IP and immunoblot assay to test DNA-dependence of interaction between  
489 endogenous p53 and Mettl3 in lysates from MEFs pre-treated with DNaseI (40 U/ml) to  
490 degrade DNA. IgG serves as negative control antibody. IPs in *p53* null cells demonstrate



491 the specificity of the p53 antibody ( $n=2$ ). Representative immunoblots are shown in all  
492 panels.

493

494 **Extended Data Fig. 2| Mettl3 overexpression induces p53 protein levels and its**  
495 **deficiency negatively impacts p53 target gene induction under acute DNA damage.**

496 **a**, Immunoblot after transfection of Flag-Mettl3 and HA-p53 plasmids into Flp-In-3T3  $p53^{-/-}$   
497 cells. Gapdh serves as loading control ( $n=2$ ). **b**, Immunoblots of wild-type and  $Mettl3^{-/-}$

498 mouse ES cells showing expression of p53 and two of its canonical targets, p21 and  
499 Mdm2, in response to dox treatment. Gapdh serves as loading control ( $n=2$ ).

500 Representative immunoblots are shown in **a and b**.

501

502 **Extended Data Fig. 3| Mettl3 enhances p53 protein half-life under acute DNA**  
503 **damage.** Immunoblot analysis of p53 protein levels in mouse ES cells treated with

504 doxorubicin (0.2  $\mu\text{g/ml}$  for 6 hours) and cycloheximide (100  $\mu\text{M}$  for indicated times).  
505 Gapdh serves as loading control. Data are representative of two biological replicates.

506

507 **Extended Data Fig. 4| Motif identification and distribution of m<sup>6</sup>A-peaks in**  
508 ***E1A;HRasV12*-expressing MEFs.** **a**, Top five sequence motifs enriched in m<sup>6</sup>A-modified

509 mRNAs in MEFs expressing shLuc control or shMettl3 RNAs that were left untreated or  
510 treated with dox. **b**, Pie charts of the frequency distribution of m<sup>6</sup>A peaks that map to the

511 listed mRNA features. m<sup>6</sup>A-IP reads were normalized to the total number of reads  
512 covering the m<sup>6</sup>A residue in the input.

513

514 **Extended Data Fig. 5.| Mettl3 supports p53 in colony formation and tumor**  
515 **suppression.** **a**, Immunoblotting for p53 and Mettl3 proteins in *E1A;HRasV12*-expressing

516  $p53^{-/-}$  MEFs transduced with either shLuc or shMettl3 RNAs ( $n=1$ ). **b**, Representative  
517 images of H&E staining of lung tissue section from mice infected with Lenti-Cre sgControl

518 (top panels) and sgMettl3 (bottom panels) viruses. Black scale bar = 500  $\mu\text{M}$ , White scale  
519 bar = 50  $\mu\text{M}$ .

520

521 **Extended Data Fig. 6| Mutual Exclusivity between TP53 and METTL3**  
522 **methyltransferase complex in human tumors.** **a**, Pan-cancer mutual exclusivity

523 analysis using DISCOVER algorithm. MTC refers to any of the complex members while  
524 MTC (core) refers to METTL3, METTL14 and WTAP. **b**, Oncoplots showing alteration  
525 frequencies of METTL3-METTL14 methyltransferase complex components in human  
526 breast, ovarian and head & neck cancers. MTC refers to any of the complex members  
527 while MTC (core) refers to METTL3, METTL14 and WTAP. TP53.tr refers to truncation  
528 mutations while TP53.ms refers to missense mutations in *TP53*. *P* and *Q* values show  
529 significance of DISCOVERY test unadjusted and adjusted for multiple testing.

530  
531 **Extended Data Fig. 7 | METTL3 and TP53 operate in the same pathway.** **a**, Differential  
532 expression (DE) analysis of TP53 target genes in human cancers. Dots represent log fold  
533 change expression of select p53 targets in METTL3 complex (MTC) mutant vs wild-type  
534 and *TP53* truncation mutant vs wild-type tumors, in human lung adenocarcinoma (LUAD),  
535 breast cancer (BRCA), ovarian cancer (OV), uterine corpus endometrial carcinoma  
536 (UCEC) and head and neck squamous cell carcinoma (HNSCC). Summary represents  
537 DE in the five cancer types shown on the left. **b**, *METLL3* Achilles score association with  
538 all genes with any mutation across the Depmap (-log<sub>10</sub> *P*-value). *P* values were  
539 calculated by a Wilcoxon signed-rank test. **c**, Density distribution of Pearson correlations  
540 between METTL14 Achilles scores. Horizontal lines represent genes of interest including  
541 MTC components, *TP53*, and regulators of p53 pathway. Red bars represent the 5<sup>th</sup> and  
542 95<sup>th</sup> quantiles of the distribution. **d**, Achilles score for METTL3 is significantly lower (more  
543 essential, *P*=0.0031) in *TP53* mutant cell lines than in WT cell lines.

## 544 545 **METHODS**

### 546 547 **Construction of Flp-In 3T3 p53-LAP, Flp-In 3T3 p53<sup>-/-</sup> and Flp-In 3T3 Mettl3<sup>-/-</sup> cell** 548 **lines**

549 We used Flp-In<sup>TM</sup>-3T3 cells (Thermo Fisher Scientific, Cat # R76107) to construct a cell  
550 line stably expressing C-terminally LAP-tagged wild-type p53 cDNA. Gateway entry  
551 vector for *Trp53* were created by BP recombination between pDONR221 and PCR  
552 amplified *Trp53* cDNA fragment. Flp-In system compatible C-terminally LAP-tagged p53  
553 (p53-LAP) was generated by LR recombination between *Trp53* entry vector and pG-

554 LAP7/puro destination vector (gift from Peter Jackson, Stanford University). Flp-In 3T3  
555 cells stably expressing p53-LAP were generated by co-transfecting 0.4  $\mu$ g of the  
556 preceding vector with 3.6  $\mu$ g of pOG44, followed by selection with 4  $\mu$ g/ml puromycin.  
557 Flp-In 3T3 p53<sup>-/-</sup> cell line was generated by Crispr/Cas9 by co-transfecting Flp-In 3T3 cells  
558 with px330 p53 plasmid (Addgene Plasmid #59910) expressing Cas9 and sgRNA  
559 targeting mouse p53 and pmaxGFP plasmid (Lonza). Similarly, Flp-In 3T3 Mettl3<sup>-/-</sup> cell  
560 line was generated using pX330 Mettl3 plasmid expressing Cas9 and sgRNA targeting  
561 mouse Mettl3. Two days post transfection, the GFP positive population was sorted by  
562 FACS and clonally expanded. Individual cell clones were screened for p53 or Mettl3  
563 deletion using standard PCR and TIDE analysis. Loss of p53 or Mettl3 protein expression  
564 was confirmed by western blotting.

565

### 566 **Tandem Affinity Purification**

567 After constructing Flp-In-3T3 expressing p53-LAP, we grew large scale cultures and  
568 affinity purified protein complexes for mass spectrometry. The cultures were either left  
569 untreated or treated with 0.2  $\mu$ g/ml dox for 6 hours. Large-scale preparations of whole-  
570 cell lysates were subjected to dual-affinity purification, first with anti-GFP antibody-  
571 coupled beads to pull-down p53-LAP complexes. We then employed PreScission™  
572 protease, which cleaves at a unique site between the GFP and S-tags and performed a  
573 second round of affinity purification using a Protein S Agarose column that binds the S-  
574 tag. The bound p53-S-tag and any interacting proteins that were co-purified were eluted  
575 off the beads under denaturing conditions and run on a gradient gel, which was stained  
576 with Coomassie blue, and each lane was cut into 8 discrete bands, which were submitted  
577 for mass spectrometric protein identification. A 10 ml packed cell volume was re-  
578 suspended with 20 mL of LAP-resuspension buffer (300 mM KCl, 50 mM HEPES-KOH  
579 [pH 7.4], 1 mM EGTA, 1 mM MgCl<sub>2</sub>, 10% glycerol, 0.5 mM DTT, and protease inhibitors  
580 (Thermo Fisher Scientific, PI88266), lysed by gradually adding 0.6 mL 10% NP-40 to a  
581 final concentration of 0.3%, then incubated on ice for 10 min. The lysate was first  
582 centrifuged at 14,000 rpm (27,000 g) at 4°C for 30 min, and the resulting supernatant was  
583 centrifuged at 43,000 rpm (100,000 g) for 1 hr at 4°C to further clarify the lysate. High  
584 speed spin supernatant was mixed with 0.5 mL of GFP-coupled beads and rotated for 1

585 hr at 4°C to capture GFP-tagged proteins, and washed five times with 1 mL LAP200N  
586 buffer (200 mM KCl, 50 mM HEPES-KOH [pH 7.4], 1 mM EGTA, 1 mM MgCl<sub>2</sub>, 10%  
587 glycerol, 0.5 mM DTT, protease inhibitors, and 0.05% NP40). After re-suspending the  
588 beads with 1 mL LAP200N buffer lacking DTT and protease inhibitors, the GFP tag was  
589 cleaved by adding 5 mg of PreScission protease and rotating tubes at 4°C for 16 hours.  
590 All subsequent steps until the cutting of bands from protein gels were performed in a  
591 laminar flow hood to prevent keratin contamination. PreScission protease-eluted  
592 supernatant was added to 100 mL of S-protein agarose (EMD Millipore, 69704-3) to  
593 capture S-tagged protein. After washing three times with LAP200N buffer lacking DTT  
594 and twice with LAP100 buffer (100 mM KCl, 50 mM HEPES-KOH [pH 7.4], 1mM EGTA,  
595 1mM MgCl<sub>2</sub>, and 10% glycerol), purified protein complexes were eluted with 50 µL of 2X  
596 LDS buffer and boiled at 95°C for 3 min. 5% of the total eluate was run on a gradient gel  
597 and silver-stained as quality control. Samples were then run on Bolt Bis-Tris Plus Gels  
598 (Thermo Fisher Scientific, NW04120BOX) in Bolt MES SDS Running Buffer (Thermo  
599 Fisher Scientific, B000202). Gels were fixed in 100 mL of fixing solution (50% methanol,  
600 10% acetic acid in Optima LC/MS grade water (Thermo Fisher Scientific, W6-1) at room  
601 temperature, and stained with Colloidal Blue Staining Kit (Thermo Fisher Scientific,  
602 LC6025). After the buffer was replaced with Optima water, the bands were cut into eight  
603 pieces, followed by washing twice with 500 µL of 50% acetonitrile in Optima water. LC-  
604 MS/MS was performed by in-gel tryptic digestion of the gel bands followed by protein  
605 identification on a high performance Thermo Scientific Orbitrap Fusion™ Tribrid™ mass  
606 spectrometer as described below.

607

## 608 **Mass Spectrometry**

609 Samples were processed for mass spectrometry by Stanford University Mass  
610 Spectrometry Facility. In a typical experiment, protein gel bands were first diced into 1  
611 mm cubes and reduced with 5 mM DTT, 50 mM ammonium bicarbonate. After removal  
612 of residual solvent, proteins were alkylated using 10 mM acrylamide in 50 mM ammonium  
613 bicarbonate for 30 min at room temperature. Digestion was performed using Trypsin/LysC  
614 (Promega, Cat # V5071) in the presence of 0.02% Protease Max (Promega, Cat # V2071)  
615 overnight at 37°C. The following day, solid particulate was condensed by centrifugation

616 and peptides extracted by adding 60% acetonitrile, 39.9% water, 0.1% formic acid and  
617 incubating for 15 min. Extracted peptides were dried in a speed vac and then  
618 reconstituted in 12.5 µl reconstitution buffer (2% acetonitrile with 0.1% Formic acid) and  
619 3 µl of it was injected on the instrument.

620 Mass spectrometry experiments were performed using an Orbitrap Fusion™ Tribrid™  
621 mass spectrometer (Thermo Scientific, San Jose, CA) with liquid chromatography  
622 performed using an Acquity M-Class UPLC (Waters Corporation, Milford, MA). For a  
623 typical LC MS experiment, a pulled-and-packed fused silica C18 reverse phase column  
624 was used, with Dr. Maisch 1.8-micron C18 beads as the packing material and a length of  
625 ~25 cm. A flow rate of 450 nL/min was used with a mobile phase A of aqueous 0.2%  
626 formic acid and mobile phase B of 0.2% formic acid in acetonitrile. Peptides were directly  
627 injected onto the analytical column using a gradient (3-45% B, followed by a high-B wash)  
628 of 80 min. The mass spectrometer was operated in a data dependent fashion, with MS1  
629 survey spectra collected in the orbitrap and MS2 fragmentation using CID for in the ion  
630 trap.

631 For data analysis, the .RAW data files were processed using Byonic (Protein Metrics, San  
632 Carlos, CA) to identify peptides and infer proteins. Proteolysis was assumed to be tryptic  
633 in nature and allowed for up to two missed cleavage sites. Precursor mass accuracies  
634 were held within 12 ppm, with MS/MS fragments held to a 0.4 Da mass accuracy. Proteins  
635 were held to a false discovery rate of 1%, using standard approaches<sup>50</sup>. Spectral counts  
636 from Byonic output were normalized by calculating NSAF values<sup>51</sup> and bait - prey  
637 interactions were scored based on large number of unrelated affinity pull-downs in mouse  
638 cell lines<sup>52</sup>.

### 639 **Cell Culturing and drug treatments**

640 Mouse embryonic fibroblasts, Flp-In-3T3 and H1299 cells were maintained in Dulbecco's  
641 Modified Eagle Medium (Gibco) supplemented with 10% Fetal Calf Serum (FCS), 1%  
642 penicillin/streptomycin, 50 µg/mL gentamicin and incubated at 37°C in a carbon dioxide  
643 incubator. Mouse ES cells were cultured as previously described<sup>16</sup>. Doxorubicin (Sigma,  
644 Cat # D1515) treatment was done at a concentration of 0.2 µg/ml for 6 hours.

645 Cycloheximide (Sigma, Cat # C7698) was treated at 100  $\mu$ M for indicated period of time.  
646 Protein extracts were treated with DNase I (Invitrogen, Cat # 18047019) at 40 U/ml for 1  
647 hr at 4°C. Ethidium Bromide was added at 10  $\mu$ g/ml to protein extracts prior to and during  
648 IP and to the wash buffer.

649

## 650 **Plasmids**

651 Cloning of p53 deletion mutants in pcDNA3.1 p53 backbone

652 Mutant p53 cDNAs were generated by polymerase chain reaction using pcDNA HA-p53  
653 vector that contains N-terminal HA tagged full-length wild-type p53 as a template. To  
654 generate p53 ( $\Delta$ 1–42), the pair of primers used were: forward primer 5'-  
655 TTTTGGCGCGCCGATCTGTTGCTGCCCCAG-3'; and reverse primer: 5'-  
656 TTTTTTAATTAATCAGTCTGAGTCAGGCC-3'. To generate p53 ( $\Delta$ 1–61), the pair of  
657 primers used were: forward primer 5'-TTTTGGCGCGCC CGAGTGTCAGGAGCTCCT-  
658 3'; and reverse primer 5'-TTTTTTAATTAATCAGTCTGAGTCAGGCC-3'.

659

660 Construction of pG-LAP2 Mettl3 (Flag-Mettl3)

661 Gateway entry vector for *Mettl3* were created by BP recombination between pDONR221  
662 and PCR amplified *Mettl3* cDNA fragment. Flp-In system compatible N-terminally FLAG-  
663 tagged Mettl3 (Flag-Mettl3) was generated by LR recombination between *Mettl3* entry  
664 vector and pG-LAP2/puro destination vector (gift from Peter Jackson lab, Stanford  
665 University). Q5 site-directed mutagenesis (NEB E0554S) kit was used to generate the  
666 Flag-Mettl3 APPA mutant expression construct.

667

668 Construction of Lenti-U6-sgMettl3/Cre vector

669 We generated lentiviral vectors carrying PGK-Cre as well as an sgRNA targeting Mettl3  
670 or control sgRNA targeting Neo. Lenti-U6-sgRNA/Cre vectors containing each sgRNA  
671 were generated as described previously<sup>53,54</sup>. Briefly, Q5 site-directed mutagenesis (NEB  
672 E0554S) kit was used to insert Mettl3 or control sgRNAs into the parental lentiviral vector  
673 containing the U6 promoter as well as PGK-Cre.

674

675 Construction of pX330 Mettl3 vector

676 We generated pX330 Mettl3 vector by cloning the previously described sgRNA targeting  
677 mouse Mettl3<sup>16</sup> into the pX330 plasmid (Addgene Plasmid #42230). The pX330 plasmid  
678 was digested using BbsI and a pair of partially complementary annealed oligos containing  
679 overhangs from BbsI site and Mettl3 sgRNA sequence were cloned scarlessly into the  
680 vector. The oligo sequences used were: 5'-CACCGGGCTTAGGGCCGCTAGAGGT-3'  
681 and 5'-AAACACCTCTAGCGGCCCTAAGCCC-3'.

682

683 Construction of pGL3-Noxa 3'UTR vector

684 A 311bp fragment encompassing the full exon 3 and a portion of the 3'UTR of mouse  
685 *Noxa* gene that harbors a Mettl3-dependent m<sup>6</sup>A motif was cloned into the XbaI site  
686 immediately downstream of the *luciferase* gene in pGL3 vector using conventional cloning  
687 strategy. The primers used for PCR amplification of the Noxa 3'UTR fragment were:  
688 forward primer 5'-AATCTAGAGACTTGAAGGACGAGTGT-3'; and reverse primer 5'-  
689 AATCTAGATTCACGTTATCACAGCTC-3'.

690

### 691 **Co-immunoprecipitation assays**

692 Cells were harvested by scraping method using cell scrapers (Corning, Cat # 3010) and  
693 lysed with ice cold NP-40 lysis buffer (50 mM Tris pH 8.0, 150 mM NaCl, 1% NP-40, 0.5  
694 mM EDTA, 10% Glycerol) containing protease inhibitors (Roche cOmplete™, Cat # 11  
695 697 498 001). Protein was quantitated using the bicinchoninic acid protein assay (BCA)  
696 kit (Pierce, Cat # 23227). 1-2 mg total protein was used for each immunoprecipitation  
697 reaction (IP) reaction in 500 µl final volume. Lysates were first pre-cleared using 50%  
698 slurry of BSA blocked Protein A sepharose beads (GE, Cat # 17-0780-01) by incubating  
699 for 30 minutes at 4°C. For Mettl3 and Mettl14 IPs, the pre-cleared lysates were incubated  
700 with 1-2 µg Mettl3 polyclonal antibody (Abclonal, A8370) or 1-2 µg Mettl14 polyclonal  
701 antibody (Abcam, ab98166) overnight at 4°C on a nutator to allow protein complexes to  
702 form. For p53 IPs, pre-cleared lysates were incubated with 2-4 µl p53 polyclonal antibody  
703 (Leica Biosystems, NCL-L-p53-CM5p) overnight at 4°C on a nutator to allow p53 protein  
704 complexes to form. The day after, immune complexes were retrieved with 50 µl of 50%  
705 slurry of BSA blocked Protein A sepharose beads for 4 hours at 4°C. Post the incubation,  
706 the beads were washed 3 times using 0.1% NP-40 containing wash buffer (50 mM Tris

707 pH 8.0, 150 mM NaCl, 0.1% NP-40, 0.5 mM EDTA, 10% Glycerol). The immobilized  
708 immunoprecipitated complexes were eluted by boiling the sepharose beads in 2X SDS  
709 sample buffer. For Flag-HA ColPs, lysates were pre-cleared using Protein A/G magnetic  
710 beads (Thermo Fisher Scientific, Cat # 26162) for 30 minutes at 4°C . The pre-cleared  
711 lysates were incubated with 25 µl Flag M2 magnetic beads (Millipore, Cat # M8823) for 4  
712 hours at 4°C to immunoprecipitate Flag-tagged Mettl3. Beads were washed 4 times using  
713 1% Triton X-100 containing wash buffer (10 mM Tris pH 8.0, 150 mM NaCl, 1% Triton X-  
714 100, 1 mM EDTA, 1 mM EGTA). Flag-protein complexes were eluted using Flag peptide  
715 (Millipore, Cat # F3290) at 150 µg/ml by incubating the beads at room temperature for 30  
716 minutes. The eluates were resolved on a 10% SDS-PAGE gel and the proteins were  
717 electroblotted onto PVDF membranes (Millipore, Immobilon-P, Cat # IPVH20200) for  
718 probing with following primary and secondary antibodies: anti-p53 (gift from Helin K, Univ.  
719 of Copenhagen, clone AI25, 1:500), anti-Mettl3 (Abclonal, A8370, 1:500), anti-Mettl14  
720 (Abcam, ab98166), anti-Mdm2 (Abcam, ab16895, 1:500), anti-Flag (Sigma, F1804,  
721 1:1000) and anti-HA (Thermo Fisher Scientific, 71-5500, 1:500), peroxidase Affinipure  
722 goat anti-mouse IgG, light chain specific (Jackson ImmunoResearch, 115-035-174,  
723 1:5,000), peroxidase IgG fraction monoclonal mouse anti-rabbit IgG, light chain specific  
724 (Jackson ImmunoResearch, 211-032-171, 1:5,000). Inputs represent 2-5% of the lysate  
725 subjected to immunoprecipitation.

726

## 727 **Immunoblotting**

728 Protein was extracted using NP-40 lysis buffer (50 mM Tris, pH 8.0, 150 mM NaCl, 1%  
729 NP-40, 0.5 mM EDTA, and 10% glycerol) containing protease inhibitors (Roche  
730 cOmplete™, Cat # 11 697 498 001). Protein was quantitated using the BCA kit (Pierce,  
731 Cat # 23227). 20 µg of protein was resolved on a 10% SDS-PAGE gel, electroblotted onto  
732 PVDF membranes (Millipore, Immobilon-P, Cat # IPVH20200) and blocked in 5% non-fat  
733 dry milk prepared in TBS with 0.1% Tween-20 (TBST). Three washes were performed in  
734 TBST, and the following primary and secondary antibodies were used: rabbit anti-p53  
735 (Leica Biosystems, NCL-L-p53-CM5p, 1:5000), rabbit anti-Mettl3 (Abclonal, A8370,  
736 1:1000), rabbit anti-Mettl14 (Abcam, ab98166, 1:1000), rabbit anti-p21 (Abcam,  
737 ab188224, 1:1,000), mouse anti-Mdm2 (Abcam, ab16895, 1:1000), mouse anti-Flag



738 (Sigma, F1804, 1:1000) and rabbit anti-HA (Thermo Fisher Scientific, 71-5500, 1:500),  
739 mouse anti-Gapdh (Fitzgerald, 10R-G109A, 1:10,000), peroxidase Affinipure goat anti-  
740 rabbit IgG (H+L) (Jackson ImmunoResearch, 111-035-144, 1:5,000), or peroxidase  
741 Affinipure goat anti-mouse IgG (H+L) (Jackson ImmunoResearch, 115-035-003, 1:5,000).  
742 Immunodetection was performed using ECL<sup>TM</sup> Prime (Millipore-Sigma, Cat#  
743 GERPN2232) or Clarity<sup>TM</sup> Western ECL substrate (Bio-Rad, Cat# 1705060).

744

#### 745 **qRT-PCR**

746 RNA extraction was performed using Trizol reagent (Thermo Fisher Scientific, Cat  
747 #15596018) according to the manufacturer's protocol. RNA (2-5 µg) was treated with  
748 DNase I (Thermo Fisher Scientific, Cat # AM1906) according to the manufacturer's  
749 instructions. Reverse transcription was conducted with M-MLV reverse transcriptase  
750 (Thermo Fisher Scientific, Cat # 28025) and random primers (Thermo Fisher Scientific,  
751 Cat # 48190). 1 µg of total RNA was used for cDNA synthesis. cDNA was diluted 1:5 in  
752 nuclease-free water and stored at -80°C until used. Quantitative PCR was performed in  
753 triplicate using PowerUP SYBR green master mix (Thermo Fisher Scientific, Cat #  
754 A25743) and a 7900HT Fast Real-Time PCR machine (Applied Biosystems). Expression  
755 analysis was performed using specific primers for each gene (Extended Data Table 1).  
756 The mean of housekeeping gene *β-Actin* was used as an internal control to normalize the  
757 variability in expression levels. All qRT-PCR performed using PowerUP SYBR Green was  
758 conducted at 50°C for 2 min, 95°C for 10 min, and then 40 cycles of 95°C for 15 s and  
759 60°C for 1 min. Melt curve analysis was done to verify the specificity of the reaction.  
760 Samples were quantified using a standard curve.

761

762 Extended Data Table 1, qRT-PCR primer list

763

| <b>Gene</b>                     | <b>Forward Primer (5'-3')</b> | <b>Reverse Primer (5'-3')</b>  |
|---------------------------------|-------------------------------|--------------------------------|
| <i>Cdkn1a</i><br>( <i>p21</i> ) | CACAGCTCAGTGGACTGGAA          | ACCCTAGACCCACAATGCAG           |
| <i>Mdm2</i>                     | CTGTGTCTACCGAGGGTGCT          | CGCTCCAACGGACTTTAACA           |
| <i>Bbc3</i><br>( <i>Puma</i> )  | GCGGCGGAGACAAGAAGA            | AGTCCCATGAAGAGATTGTACAT<br>GAC |

|                              |                               |                       |
|------------------------------|-------------------------------|-----------------------|
| <i>Pmaip1</i><br>(Noxa)      | GCAGAGCTACCACCTGAGTTC         | CTTTTGCGACTTCCCAGGCA  |
| <i>Bax</i>                   | TGAAGACAGGGGCCTTTTTG          | AATTCGCCGGAGACACTCG   |
| <i>Tnfrsf10b</i><br>(Killer) | AACACGGAACCTGGCAAGA           | TTTCCGTTTACCGGAACCA   |
| <i>Fas</i>                   | CTGCGATGAAGAGCATGGTT          | GCGCAGCGAACACAGTGTT   |
| <i>β-Actin</i>               | TCCTAGCACCATGAAGATCAAG<br>ATC | CTGCTTGCTGATCCACATCTG |
| <i>Trp53inp1</i>             | CTTCTTCCAGCCAAGAACCA          | CTGAGAAACCAGGGCAGGTA  |
| <i>Gadd45a</i>               | CTCGGCTGCAGAGCAGAAGA          | GGCACAGTACCACGTTATCG  |
| <i>Neat1</i>                 | CCTGGGGATGAGGCCTGGTCT         | GGCCAGAGCTGTCCGCCC    |
| <i>Mettl3</i>                | ATCCAGGCCCATTAAGAAACAG        | CTATCACTACGGAAGGTTGGG |

764

## 765 **ChIP**

766 Analysis of Mettl3 chromatin binding was done in Wild-type and *p53<sup>-/-</sup> E1A;HRasV12-*  
767 expressing MEFs. MEFs were seeded at 7 x 10<sup>6</sup> cells per 10 cm dish, one day prior to  
768 the ChIP experiment. After treatment with 0.2 μg/ml doxorubicin for 6h, cells were  
769 harvested to prepare chromatin for immunoprecipitation using either p53 polyclonal  
770 antibodies (Leica Biosystems, Cat # NCL-L-p53-CM5p) or Mettl3 polyclonal antibodies  
771 (Abclonal, Cat # A8853). ChIPs were performed essentially as described previously  
772 (Kenzelmann Broz, D. et al, 2013)<sup>23</sup>. Chromatin-immunoprecipitated DNA was analyzed  
773 by quantitative PCR with binding site-specific primers (Extended Data Table 2) using  
774 PowerUP SYBR green master mix (Thermo Fisher Scientific, Cat # A25743) and a  
775 7900HT Fast Real-Time PCR machine (Applied Biosystems). The signals obtained from  
776 the ChIP were analyzed by the percent input method.

777

778 Extended Data Table 2, ChIP-qPCR primer list

779

| <b>Gene</b> | <b>Forward Primer (5'-3')</b> | <b>Reverse Primer (5'-3')</b> |
|-------------|-------------------------------|-------------------------------|
|-------------|-------------------------------|-------------------------------|

---

|                                 |                           |                              |
|---------------------------------|---------------------------|------------------------------|
| <i>Mdm2</i>                     | CTT CCT GTG GGG CTG GTC   | CGG GGC AGC GTT TAA ATA AC   |
| <i>Cdkn1a</i><br>( <i>p21</i> ) | GAGACCAGCAGCAAAATCG       | CAGCCCCACCTCTTCAATTC         |
| <i>Noxa</i>                     | AAGCAATTTGGGGGTTGAG       | GAGCGAAGTGGAGCAGGTC          |
| <i>Neat 1</i>                   | GAATCTGCAAGCAAGGCCCG<br>G | GAGCAAGCCAGCACTTGCCACA<br>TA |
| <i>Trp53inp1</i>                | CTCACGTAAGTGCGGGCTAC      | GGAGAGAGTCCGGCATGAAA         |

---

780

### 781 **Lentiviral shRNA cell lines**

782 pSico shMettl3 constructs were a gift from Pedro Batista, NIH. Lentivirus carrying shMettl3  
783 were produced by co-transfecting 293T cells with 150 ng of pCMV-VSV-G, 350 ng of  
784 pCMV-dR8.2 dvpr, and 500 ng of pSico shMettl3 plasmids previously described. Media  
785 was replaced 16 hr after transfection to omit transfection reagent, and virus was  
786 harvested at 48 hr post-transfection. Virus was then filtered with a 0.45  $\mu$ m PVDF filter  
787 (SLHV013SL, Millipore) and mixed with polybrene (TR-1003-G, Millipore). Wild-type or  
788 p53 null *E1A;HRasV12*-expressing MEFs<sup>24</sup> were infected for 48 hr, followed by selection  
789 with 2  $\mu$ g/ml puromycin.

790

### 791 **m<sup>6</sup>A-eCLIP-seq**

792 m<sup>6</sup>A-eCLIP was performed at Eclipse BioInnovations Inc, San Diego CA as described  
793 below. The procedure started by isolating mRNAs through poly(A) selection using oligo  
794 (dT) beads (Thermo Fisher Scientific) followed by magnetic bead separation from 50  $\mu$ g  
795 of total RNA. The mRNA was DNase treated at 37°C for 10 minutes then immediately  
796 sheared into 100-200nt fragments by heating at 95°C for 12 minutes in 1x Turbo DNase  
797 buffer (Thermo Fisher Scientific). An anti-m<sup>6</sup>A antibody (CST) was added, and samples  
798 were UV-C crosslinked using a UVP CL-1000 crosslinker at 2 rounds of 150 mJ/cm<sup>2</sup>  
799 using 254nm wavelength. The antibody-RNA complexes were then coupled overnight to  
800 protein G beads (CST). Following overnight coupling, library preparation (including  
801 adapter ligations, SDS-PAGE electrophoresis and nitrocellulose membrane transfer,  
802 reverse transcription, and PCR amplification) was performed as previously described for  
803 standard eCLIP<sup>55</sup>, with the 30-110 kDa region size-selected by cutting from the

804 membrane (corresponding to RNA fragments crosslinked to antibody heavy and light  
805 chains). 10 ng of fragmented mRNA was run as an RNA-seq input control, starting with  
806 FastAP treatment as described<sup>55</sup>. The final library's shape and yield was assessed by  
807 Agilent TapeStation.

808 The eCLIP cDNA adapter contains a sequence of 10 random nucleotides at the 5'  
809 end. This random sequence serves as a unique molecular identifier (UMI)<sup>56</sup> after  
810 sequencing primers are ligated to the 3' end of cDNA molecules. Therefore, eCLIP reads  
811 begin with the UMI and, in the first step of analysis, UMIs were pruned from read  
812 sequences using `umi_tools` (v0.5.1)<sup>57</sup>. UMI sequences were saved by incorporating them  
813 into the read names in the FASTQ files to be utilized in subsequent analysis steps. Next,  
814 3'-adapters were trimmed from reads using `cutadapt` (v2.7)  
815 [<https://doi.org/10.14806/ej.17.1.200>] and reads shorter than 18 bp in length were  
816 removed. Reads were then mapped to a database of mouse repetitive elements and  
817 rRNA sequences compiled from Dfam<sup>58</sup> and Genbank<sup>59</sup>. All non-repeat mapped reads  
818 were mapped to the mouse genome (mm10) using STAR (v2.6.0c)<sup>60</sup>. PCR duplicates  
819 were removed using `umi_tools` (v0.5.1) by utilizing UMI sequences from the read names  
820 and mapping positions. Peaks were identified within m<sup>6</sup>A-eCLIP samples using the peak  
821 caller CLIPper (<https://github.com/YeoLab/clipper>)<sup>61</sup>. For each peak, IP versus input fold  
822 enrichment values were calculated as a ratio of counts of reads overlapping the peak  
823 region in the IP and the input samples (read counts in each sample were normalized  
824 against the total number of reads in the sample after PCR duplicate removal). A p-value  
825 was calculated for each peak by the Yates' Chi-Square test, or Fisher Exact Test if the  
826 observed or expected read number was below 5. Comparison of different sample  
827 conditions was evaluated in the same manner as IP versus input enrichment; for each  
828 peak called in IP libraries of one sample type we calculated enrichment and p-values  
829 relative to normalized counts of reads overlapping these peaks in another sample type.  
830 Peaks were annotated using transcript information from GENCODE (Release M21)<sup>62</sup> with  
831 the following priority hierarchy to define the final annotation of overlapping features:  
832 protein coding transcript (CDS, UTRs, intron), followed by non-coding transcripts (exon,  
833 intron). The RPM value for a particular region was calculated by counting the number of  
834 reads in that region and dividing that by the "per million" scaling factor, which is defined

835 as the total number of reads in the sample divided by 1,000,000. The log<sub>2</sub> fold changes  
836 for a peak are calculated as follows: Log<sub>2</sub> (RPM in IP in peak region / RPM in input in  
837 peak region). Log<sub>2</sub> fold change values (RPM in IP in peak region / RPM in input in peak  
838 region) were calculated for individual peaks in each m<sup>6</sup>A-IP to normalize the IP reads to  
839 the total number of reads covering the m<sup>6</sup>A residue. The differential of Log<sub>2</sub> fold change  
840 between shLuc and shMettl3 samples treated with dox, was used to identify genes that  
841 were most enriched for a specific m<sup>6</sup>A modification under DNA damage in a Mettl3-  
842 dependent manner.

843

#### 844 **Luciferase reporter assays**

845 pGL3-empty or pGL3-Noxa 3'UTR *luciferase* constructs were co-transfected with pRL-  
846 SV40 (*Renilla* plasmid) and pgLAP2-*Mettl3* into Flp-In 3T3 *Mettl3*<sup>-/-</sup> cells. Luciferase  
847 activity was measured 24 hours after transfection. Values were first normalized to internal  
848 control, *Renilla* luciferase and then to control sample (pGL3-empty vector with no *Mettl3*  
849 reconstitution). Immunoblots were performed in parallel samples to confirm the  
850 expression of Flag-*Mettl3*.

851

#### 852 **Low plating assays**

853 shLuc and shMettl3 *E1A;HRas*<sup>V12</sup> MEFs were plated on six-well plates at 150 cells per  
854 well in triplicate and grown for 10-12 days. Cells were fixed with 10% formalin and stained  
855 with 0.1% crystal violet stain. Plates were scanned, and colonies were counted manually.

856

#### 857 **Mice**

858 ICR SCID male mice were obtained from Taconic Biosciences (Cat # ICRSC-M). *Kras*<sup>LSL-</sup>  
859 *G12D* (K), *Rosa26*<sup>LSL-Tomato</sup> (T), and *H11*<sup>LSL-Cas9</sup> (Cas9) mice have been described  
860 previously<sup>53,63,64</sup>. All mice were maintained under pathogen-free conditions at the  
861 Stanford animal care facility. All experiments were approved by Administrative Panel on  
862 Laboratory Animal Care at Stanford University.

863

#### 864 **Subcutaneous tumor assays**

865 Subcutaneous tumor studies were performed as described previously<sup>25</sup>. Briefly,  $1 \times 10^6$   
866 shLuc or shMettl3 *E1A;Ras<sup>V12</sup>* MEFs were subcutaneously injected into the flanks  
867 of Scid mice, and tumors were weighted at 32 days post-injection.

868

### 869 **Lung Adenocarcinoma assay**

870 Lentiviral particles were produced and tittered as described previously<sup>54</sup>. Lung tumors  
871 were initiated by intratracheal infection of mice as described previously<sup>65</sup> using lentiviral-  
872 Cre vectors at the indicated titers. Lung tumors were induced by intratracheal  
873 administration of 90,000 particles of Lenti-U6-sgRNA/PGK-Cre virus to 6-12 week old  
874 mice as previously described<sup>65</sup>. Lungs were harvested at 20 weeks after inoculation and  
875 tumor burden was assessed by histology as indicated.

876

### 877 **Histology**

878 Hematoxylin and eosin (H&E) staining on paraffin embedded lung tissues were performed  
879 using standard protocols. A NanoZoomer 2.0-RS slide scanner (Hamamatsu) was used  
880 for imaging.

881

### 882 **Mutual Exclusivity, Differential Expression Analysis and Achilles Perturbation Data**

883 TCGA gene expression data was downloaded from [gdc.cancer.gov](http://gdc.cancer.gov). Whole Exome  
884 Sequencing annotations (MAF file) was downloaded from<sup>66</sup>. Gene expression raw counts  
885 were normalized using *voom* from *limma* package. Limma was used to calculate the TP53  
886 targets differential expression between TP53 truncated tumors and TP53 wild-type, and  
887 between MTC altered (mutated, amplified or deleted) tumors and MTC wild-type for each  
888 tumor type individually. Summary fold changes were obtained using the function  
889 *combine.est* from *genefu* package.

890 Discover test<sup>67</sup> was used to calculate mutual exclusivity across MTC genes (mutated or  
891 deleted) and TP53 (missense or truncated mutations) across all TCGA cancer tissues  
892 individually and combined (adjusted by tissue).

893 Achilles perturbation scores and CCLE mutations were downloaded from DepMap site  
894 ([depmap.org](http://depmap.org), version 20Q2). Two sample Wilcoxon test was used to compare METTL3  
895 Achilles score and mutation profiles (hotspot mutations as defined in DepMap). The

896 Mettl3 Achilles scores were scaled such that the mean is 0 and the standard deviation is  
897 1. Scaled scores were calculated using the formula: scaled score = (actual score - mean  
898 (actual score)) / sd(actual score). Pearson correlation was used to calculate correlation  
899 across Achilles scores.

900

## 901 **ACKNOWLEDGEMENTS**

902 We thank Pedro Batista for the kind gift of the pSico shMettl3 constructs and James  
903 Broughton for bioinformatics support. This work was supported by an NIH R35 grant  
904 (CA197591) and the Virginia and D.K. Ludwig Fund for Cancer Research to LDA. H.Y.C.  
905 is an Investigator of the Howard Hughes Medical Institute.

906

## 907 **AUTHOR CONTRIBUTIONS**

908 L.D.A. conceived and designed the overall study. N.R, M.W, N.A.M, J.D., A.M.K., J.A.S.,  
909 T.B., A.S.M, C.M. performed and analyzed experiments. All authors contributed to the  
910 interpretation of experiments. L.D.A and N.R. wrote and edited the manuscript. All authors  
911 reviewed the manuscript.

912

## 913 **DISCLOSURE**

914 H.Y.C. is a co-founder of Accent Therapeutics, Boundless Bio and an advisor of 10x  
915 Genomics, Arsenal Biosciences, and Spring Discovery. The remaining authors declare  
916 no competing interests.

917

918 **REFERENCES**

919

- 920 1 Kandoth, C. *et al.* Mutational landscape and significance across 12 major cancer  
921 types. *Nature* **502**, 333-339, doi:10.1038/nature12634 (2013).
- 922 2 Biegging, K. T., Mello, S. S. & Attardi, L. D. Unravelling mechanisms of p53-  
923 mediated tumour suppression. *Nat Rev Cancer* **14**, 359-370, doi:10.1038/nrc3711  
924 (2014).
- 925 3 Vousden, K. H. & Prives, C. Blinded by the Light: The Growing Complexity of p53.  
926 *Cell* **137**, 413-431, doi:10.1016/j.cell.2009.04.037 (2009).
- 927 4 Kasthuber, E. R. & Lowe, S. W. Putting p53 in Context. *Cell* **170**, 1062-1078,  
928 doi:10.1016/j.cell.2017.08.028 (2017).
- 929 5 Brady, C. A. *et al.* Distinct p53 transcriptional programs dictate acute DNA-damage  
930 responses and tumor suppression. *Cell* **145**, 571-583,  
931 doi:10.1016/j.cell.2011.03.035 (2011).
- 932 6 Olivier, M., Hollstein, M. & Hainaut, P. TP53 mutations in human cancers: origins,  
933 consequences, and clinical use. *Cold Spring Harb Perspect Biol* **2**, a001008,  
934 doi:10.1101/cshperspect.a001008 (2010).
- 935 7 Sabapathy, K. & Lane, D. P. Therapeutic targeting of p53: all mutants are equal,  
936 but some mutants are more equal than others. *Nat Rev Clin Oncol* **15**, 13-30,  
937 doi:10.1038/nrclinonc.2017.151 (2018).
- 938 8 Haberle, V. & Stark, A. Eukaryotic core promoters and the functional basis of  
939 transcription initiation. *Nat Rev Mol Cell Biol* **19**, 621-637, doi:10.1038/s41580-  
940 018-0028-8 (2018).
- 941 9 Espinosa, J. M., Verdun, R. E. & Emerson, B. M. p53 functions through stress- and  
942 promoter-specific recruitment of transcription initiation components before and  
943 after DNA damage. *Mol Cell* **12**, 1015-1027, doi:10.1016/s1097-2765(03)00359-9  
944 (2003).
- 945 10 Raj, N. & Attardi, L. D. The Transactivation Domains of the p53 Protein. *Cold*  
946 *Spring Harb Perspect Med* **7**, doi:10.1101/cshperspect.a026047 (2017).



- 947 11 Vihervaara, A., Duarte, F. M. & Lis, J. T. Molecular mechanisms driving  
948 transcriptional stress responses. *Nat Rev Genet* **19**, 385-397, doi:10.1038/s41576-  
949 018-0001-6 (2018).
- 950 12 Shi, H., Wei, J. & He, C. Where, When, and How: Context-Dependent Functions  
951 of RNA Methylation Writers, Readers, and Erasers. *Mol Cell* **74**, 640-650,  
952 doi:10.1016/j.molcel.2019.04.025 (2019).
- 953 13 Johnson, T. M., Hammond, E. M., Giaccia, A. & Attardi, L. D. The p53QS  
954 transactivation-deficient mutant shows stress-specific apoptotic activity and  
955 induces embryonic lethality. *Nat Genet* **37**, 145-152, doi:10.1038/ng1498 (2005).
- 956 14 Liu, J. *et al.* A METTL3-METTL14 complex mediates mammalian nuclear RNA N6-  
957 adenosine methylation. *Nat Chem Biol* **10**, 93-95, doi:10.1038/nchembio.1432  
958 (2014).
- 959 15 Wang, X. *et al.* Structural basis of N(6)-adenosine methylation by the METTL3-  
960 METTL14 complex. *Nature* **534**, 575-578, doi:10.1038/nature18298 (2016).
- 961 16 Batista, P. J. *et al.* m(6)A RNA modification controls cell fate transition in  
962 mammalian embryonic stem cells. *Cell Stem Cell* **15**, 707-719,  
963 doi:10.1016/j.stem.2014.09.019 (2014).
- 964 17 Haupt, Y., Maya, R., Kazaz, A. & Oren, M. Mdm2 promotes the rapid degradation  
965 of p53. *Nature* **387**, 296-299, doi:10.1038/387296a0 (1997).
- 966 18 Kubbutat, M. H., Jones, S. N. & Vousden, K. H. Regulation of p53 stability by  
967 Mdm2. *Nature* **387**, 299-303, doi:10.1038/387299a0 (1997).
- 968 19 Momand, J., Zambetti, G. P., Olson, D. C., George, D. & Levine, A. J. The mdm-2  
969 oncogene product forms a complex with the p53 protein and inhibits p53-mediated  
970 transactivation. *Cell* **69**, 1237-1245, doi:10.1016/0092-8674(92)90644-r (1992).
- 971 20 Oliner, J. D. *et al.* Oncoprotein MDM2 conceals the activation domain of tumour  
972 suppressor p53. *Nature* **362**, 857-860, doi:10.1038/362857a0 (1993).
- 973 21 Mello, S. S. *et al.* A p53 Super-tumor Suppressor Reveals a Tumor Suppressive  
974 p53-Ptpn14-Yap Axis in Pancreatic Cancer. *Cancer Cell* **32**, 460-473 e466,  
975 doi:10.1016/j.ccell.2017.09.007 (2017).
- 976 22 Bujnicki, J. M., Feder, M., Radlinska, M. & Blumenthal, R. M. Structure prediction  
977 and phylogenetic analysis of a functionally diverse family of proteins homologous

- 978 to the MT-A70 subunit of the human mRNA:m(6)A methyltransferase. *J Mol Evol*  
979 **55**, 431-444, doi:10.1007/s00239-002-2339-8 (2002).
- 980 23 Kenzelmann Broz, D. *et al.* Global genomic profiling reveals an extensive p53-  
981 regulated autophagy program contributing to key p53 responses. *Genes Dev* **27**,  
982 1016-1031, doi:10.1101/gad.212282.112 (2013).
- 983 24 Biegging-Rolett, K. T. *et al.* Zmat3 Is a Key Splicing Regulator in the p53 Tumor  
984 Suppression Program. *Mol Cell* **80**, 452-469 e459,  
985 doi:10.1016/j.molcel.2020.10.022 (2020).
- 986 25 Jiang, D. *et al.* Full p53 transcriptional activation potential is dispensable for tumor  
987 suppression in diverse lineages. *Proc Natl Acad Sci U S A* **108**, 17123-17128,  
988 doi:10.1073/pnas.1111245108 (2011).
- 989 26 Zaccara, S., Ries, R. J. & Jaffrey, S. R. Reading, writing and erasing mRNA  
990 methylation. *Nat Rev Mol Cell Biol* **20**, 608-624, doi:10.1038/s41580-019-0168-5  
991 (2019).
- 992 27 Barbieri, I. *et al.* Promoter-bound METTL3 maintains myeloid leukaemia by m(6)A-  
993 dependent translation control. *Nature* **552**, 126-131, doi:10.1038/nature24678  
994 (2017).
- 995 28 Bertero, A. *et al.* The SMAD2/3 interactome reveals that TGFbeta controls m(6)A  
996 mRNA methylation in pluripotency. *Nature* **555**, 256-259, doi:10.1038/nature25784  
997 (2018).
- 998 29 Huang, H. *et al.* Histone H3 trimethylation at lysine 36 guides m(6)A RNA  
999 modification co-transcriptionally. *Nature* **567**, 414-419, doi:10.1038/s41586-019-  
1000 1016-7 (2019).
- 1001 30 Du, H. *et al.* YTHDF2 destabilizes m(6)A-containing RNA through direct  
1002 recruitment of the CCR4-NOT deadenylase complex. *Nat Commun* **7**, 12626,  
1003 doi:10.1038/ncomms12626 (2016).
- 1004 31 Wang, X. *et al.* N6-methyladenosine-dependent regulation of messenger RNA  
1005 stability. *Nature* **505**, 117-120, doi:10.1038/nature12730 (2014).
- 1006 32 Shi, H. *et al.* YTHDF3 facilitates translation and decay of N(6)-methyladenosine-  
1007 modified RNA. *Cell Res* **27**, 315-328, doi:10.1038/cr.2017.15 (2017).

- 1008 33 Huang, H. *et al.* Recognition of RNA N(6)-methyladenosine by IGF2BP proteins  
1009 enhances mRNA stability and translation. *Nat Cell Biol* **20**, 285-295,  
1010 doi:10.1038/s41556-018-0045-z (2018).
- 1011 34 Xiao, W. *et al.* Nuclear m(6)A Reader YTHDC1 Regulates mRNA Splicing. *Mol*  
1012 *Cell* **61**, 507-519, doi:10.1016/j.molcel.2016.01.012 (2016).
- 1013 35 Meyer, K. D. *et al.* 5' UTR m(6)A Promotes Cap-Independent Translation. *Cell* **163**,  
1014 999-1010, doi:10.1016/j.cell.2015.10.012 (2015).
- 1015 36 Wang, X. *et al.* N(6)-methyladenosine Modulates Messenger RNA Translation  
1016 Efficiency. *Cell* **161**, 1388-1399, doi:10.1016/j.cell.2015.05.014 (2015).
- 1017 37 Choe, J. *et al.* mRNA circularization by METTL3-eIF3h enhances translation and  
1018 promotes oncogenesis. *Nature* **561**, 556-560, doi:10.1038/s41586-018-0538-8  
1019 (2018).
- 1020 38 Lin, S., Choe, J., Du, P., Triboulet, R. & Gregory, R. I. The m(6)A Methyltransferase  
1021 METTL3 Promotes Translation in Human Cancer Cells. *Mol Cell* **62**, 335-345,  
1022 doi:10.1016/j.molcel.2016.03.021 (2016).
- 1023 39 Cui, Q. *et al.* m(6)A RNA Methylation Regulates the Self-Renewal and  
1024 Tumorigenesis of Glioblastoma Stem Cells. *Cell Rep* **18**, 2622-2634,  
1025 doi:10.1016/j.celrep.2017.02.059 (2017).
- 1026 40 Lee, H. *et al.* Stage-specific requirement for Mettl3-dependent m(6)A mRNA  
1027 methylation during haematopoietic stem cell differentiation. *Nat Cell Biol* **21**, 700-  
1028 709, doi:10.1038/s41556-019-0318-1 (2019).
- 1029 41 Kaiser, A. M. & Attardi, L. D. Deconstructing networks of p53-mediated tumor  
1030 suppression in vivo. *Cell Death Differ* **25**, 93-103, doi:10.1038/cdd.2017.171  
1031 (2018).
- 1032 42 Krizhanovsky, V. & Lowe, S. W. Stem cells: The promises and perils of p53. *Nature*  
1033 **460**, 1085-1086, doi:10.1038/4601085a (2009).
- 1034 43 Xiang, Y. *et al.* RNA m(6)A methylation regulates the ultraviolet-induced DNA  
1035 damage response. *Nature* **543**, 573-576, doi:10.1038/nature21671 (2017).
- 1036 44 Knuckles, P. *et al.* RNA fate determination through cotranscriptional adenosine  
1037 methylation and microprocessor binding. *Nat Struct Mol Biol* **24**, 561-569,  
1038 doi:10.1038/nsmb.3419 (2017).

- 1039 45 Huang, H., Weng, H. & Chen, J. m(6)A Modification in Coding and Non-coding  
1040 RNAs: Roles and Therapeutic Implications in Cancer. *Cancer Cell* **37**, 270-288,  
1041 doi:10.1016/j.ccell.2020.02.004 (2020).
- 1042 46 Vu, L. P. *et al.* The N(6)-methyladenosine (m(6)A)-forming enzyme METTL3  
1043 controls myeloid differentiation of normal hematopoietic and leukemia cells. *Nat*  
1044 *Med* **23**, 1369-1376, doi:10.1038/nm.4416 (2017).
- 1045 47 Li, X. *et al.* The M6A methyltransferase METTL3: acting as a tumor suppressor in  
1046 renal cell carcinoma. *Oncotarget* **8**, 96103-96116, doi:10.18632/oncotarget.21726  
1047 (2017).
- 1048 48 Liu, J. *et al.* m(6)A mRNA methylation regulates AKT activity to promote the  
1049 proliferation and tumorigenicity of endometrial cancer. *Nat Cell Biol* **20**, 1074-1083,  
1050 doi:10.1038/s41556-018-0174-4 (2018).
- 1051 49 Weng, H. *et al.* METTL14 Inhibits Hematopoietic Stem/Progenitor Differentiation  
1052 and Promotes Leukemogenesis via mRNA m(6)A Modification. *Cell Stem Cell* **22**,  
1053 191-205 e199, doi:10.1016/j.stem.2017.11.016 (2018).
- 1054 50 Elias, J. E. & Gygi, S. P. Target-decoy search strategy for increased confidence in  
1055 large-scale protein identifications by mass spectrometry. *Nat Methods* **4**, 207-214,  
1056 doi:10.1038/nmeth1019 (2007).
- 1057 51 Zybilov, B. *et al.* Statistical analysis of membrane proteome expression changes  
1058 in *Saccharomyces cerevisiae*. *J Proteome Res* **5**, 2339-2347,  
1059 doi:10.1021/pr060161n (2006).
- 1060 52 Li, B. *et al.* Drebrin restricts rotavirus entry by inhibiting dynamin-mediated  
1061 endocytosis. *Proc Natl Acad Sci U S A* **114**, E3642-E3651,  
1062 doi:10.1073/pnas.1619266114 (2017).
- 1063 53 Chiou, S. H. *et al.* Pancreatic cancer modeling using retrograde viral vector  
1064 delivery and in vivo CRISPR/Cas9-mediated somatic genome editing. *Genes Dev*  
1065 **29**, 1576-1585, doi:10.1101/gad.264861.115 (2015).
- 1066 54 Rogers, Z. N. *et al.* A quantitative and multiplexed approach to uncover the fitness  
1067 landscape of tumor suppression in vivo. *Nat Methods* **14**, 737-742,  
1068 doi:10.1038/nmeth.4297 (2017).

- 1069 55 Van Nostrand, E. L. *et al.* Robust transcriptome-wide discovery of RNA-binding  
1070 protein binding sites with enhanced CLIP (eCLIP). *Nat Methods* **13**, 508-514,  
1071 doi:10.1038/nmeth.3810 (2016).
- 1072 56 Kivioja, T. *et al.* Counting absolute numbers of molecules using unique molecular  
1073 identifiers. *Nat Methods* **9**, 72-74, doi:10.1038/nmeth.1778 (2011).
- 1074 57 Smith, T., Heger, A. & Sudbery, I. UMI-tools: modeling sequencing errors in Unique  
1075 Molecular Identifiers to improve quantification accuracy. *Genome Res* **27**, 491-  
1076 499, doi:10.1101/gr.209601.116 (2017).
- 1077 58 Hubley, R. *et al.* The Dfam database of repetitive DNA families. *Nucleic Acids Res*  
1078 **44**, D81-89, doi:10.1093/nar/gkv1272 (2016).
- 1079 59 Benson, D. A. *et al.* GenBank. *Nucleic Acids Res* **42**, D32-37,  
1080 doi:10.1093/nar/gkt1030 (2014).
- 1081 60 Dobin, A. *et al.* STAR: ultrafast universal RNA-seq aligner. *Bioinformatics* **29**, 15-  
1082 21, doi:10.1093/bioinformatics/bts635 (2013).
- 1083 61 Lovci, M. T. *et al.* Rbfox proteins regulate alternative mRNA splicing through  
1084 evolutionarily conserved RNA bridges. *Nat Struct Mol Biol* **20**, 1434-1442,  
1085 doi:10.1038/nsmb.2699 (2013).
- 1086 62 Frankish, A. *et al.* GENCODE reference annotation for the human and mouse  
1087 genomes. *Nucleic Acids Res* **47**, D766-D773, doi:10.1093/nar/gky955 (2019).
- 1088 63 Jackson, E. L. *et al.* Analysis of lung tumor initiation and progression using  
1089 conditional expression of oncogenic K-ras. *Genes Dev* **15**, 3243-3248,  
1090 doi:10.1101/gad.943001 (2001).
- 1091 64 Madisen, L. *et al.* A robust and high-throughput Cre reporting and characterization  
1092 system for the whole mouse brain. *Nat Neurosci* **13**, 133-140, doi:10.1038/nn.2467  
1093 (2010).
- 1094 65 DuPage, M., Dooley, A. L. & Jacks, T. Conditional mouse lung cancer models  
1095 using adenoviral or lentiviral delivery of Cre recombinase. *Nat Protoc* **4**, 1064-  
1096 1072, doi:10.1038/nprot.2009.95 (2009).
- 1097 66 Ellrott, K. *et al.* Scalable Open Science Approach for Mutation Calling of Tumor  
1098 Exomes Using Multiple Genomic Pipelines. *Cell Syst* **6**, 271-281 e277,  
1099 doi:10.1016/j.cels.2018.03.002 (2018).

1100 67 Canisius, S., Martens, J. W. & Wessels, L. F. A novel independence test for  
1101 somatic alterations in cancer shows that biology drives mutual exclusivity but  
1102 chance explains most co-occurrence. *Genome Biol* **17**, 261, doi:10.1186/s13059-  
1103 016-1114-x (2016).  
1104

**Figure 1 | Mettl3 interacts with p53 and enhances p53 transcriptional activity in DNA-damage treated cells.**

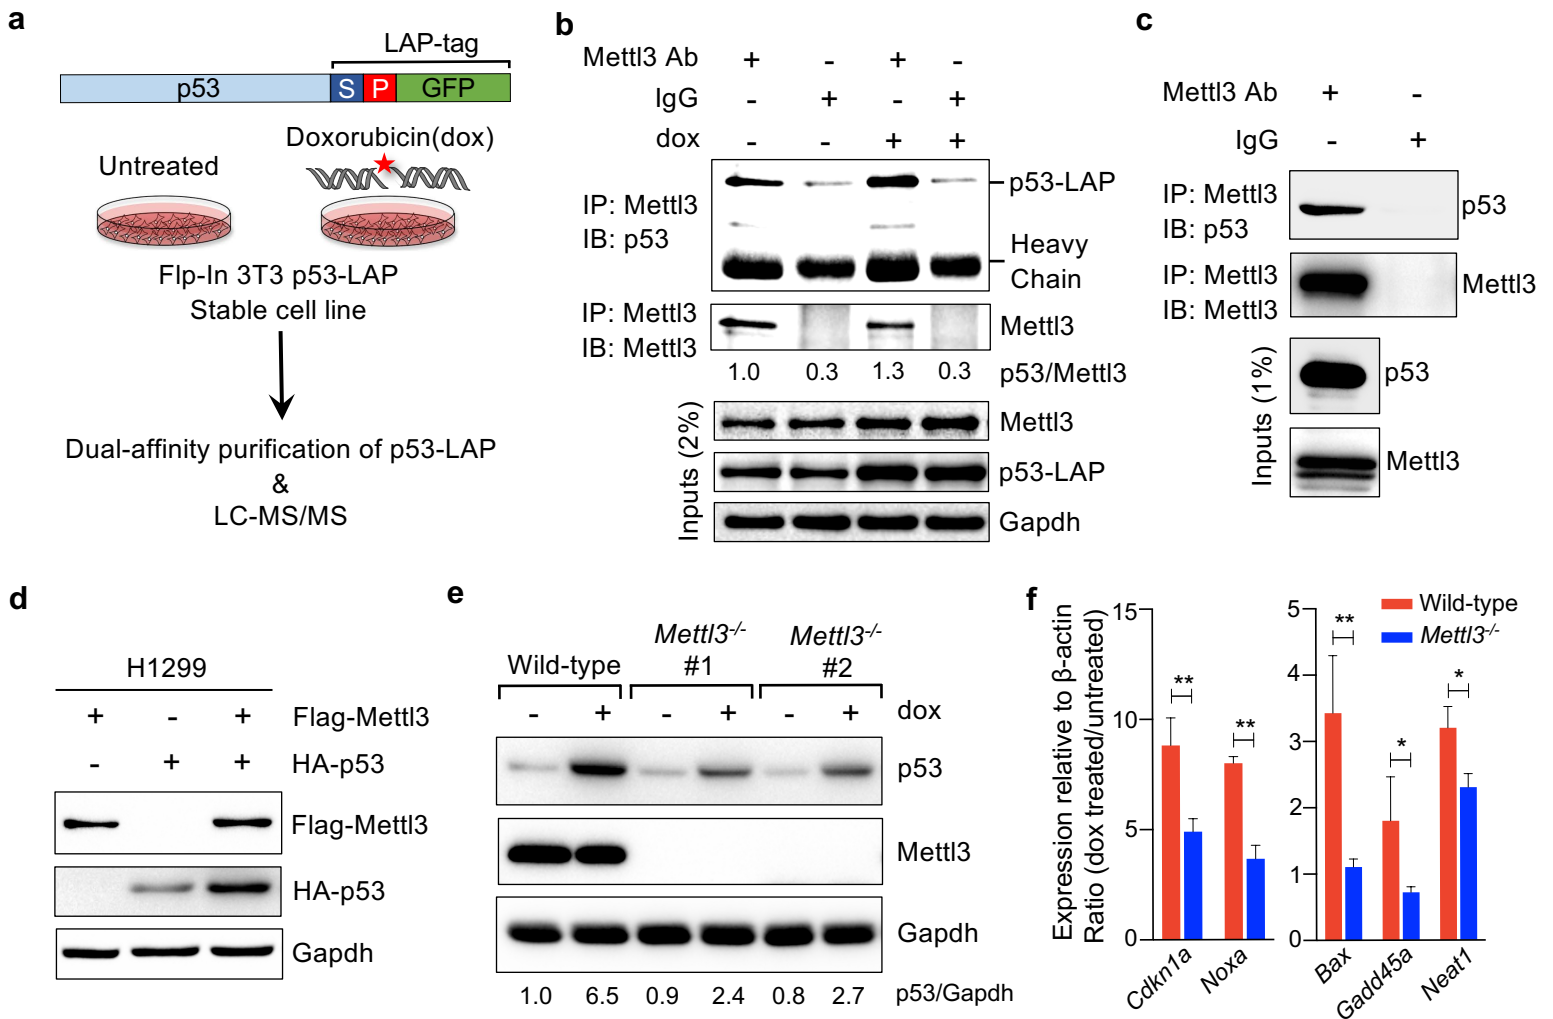

**Fig. 1 | Mettl3 interacts with p53 and enhances p53 transcriptional activity in DNA-damage treated cells. a,** Schematic of dual-affinity purification of LAP-tagged p53 protein in Flp-In-3T3 fibroblasts. Cells were either left untreated or treated with 0.2 µg/mL doxorubicin (dox) for 6 hours, followed by dual affinity purification of p53-bound protein complexes and protein identification by LC-MS/MS. **b,** Co-immunoprecipitation (Co-IP) and immunoblot assay to validate p53-LAP and endogenous Mettl3 interaction in untreated and DNA damage treated Flp-In-3T3 cells. Numbers underneath indicate the amount of p53 co-precipitated relative to Mettl3 ( $n=3$ ). **c,** Co-IP and immunoblot assay to examine interaction of endogenous Mettl3 and p53 in *E1A;HRasV12*-expressing MEFs ( $n=2$ ). **d,** Immunoblot after transfection of Flag-Mettl3 and HA-p53 plasmids into H1299 cells ( $n=3$ ). **e,** p53 induction after 6 hours dox (0.2 µg/mL) in wild-type and two different *Mettl3*<sup>-/-</sup> ES cell lines. Numbers underneath indicate the amount of p53 relative to Gapdh loading control ( $n=3$ ). **f,** Induction of p53 target genes after 6 hours dox (0.2 µg/mL) in *Mettl3*<sup>-/-</sup> ES cells relative to wild-type cells, normalized to  $\beta$ -Actin. *Mettl3*<sup>-/-</sup> depicts mean of two different *Mettl3* knockout cell lines. Data are mean  $\pm$  s.e.m. of at least three biological replicates each with three technical replicates.  $P$  values were determined by the unpaired two-tailed Student's  $t$ -test. \* $P<0.05$ , \*\* $P<0.01$ . Representative immunoblots are shown in **b,c,d** and **e**, and Gapdh serves as a loading control.

**Figure 2| Mettl3 knockdown impairs p53 accumulation and target gene induction in response to DNA damage in oncogene-expressing primary MEFs**

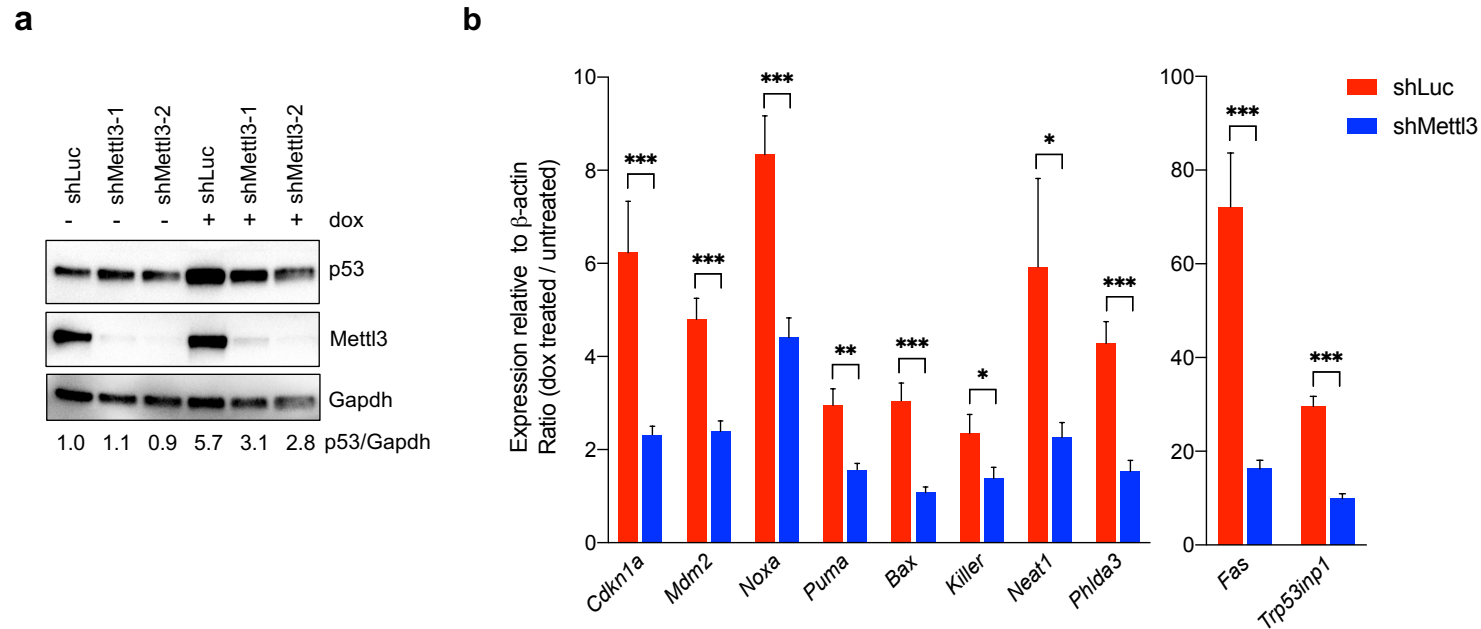

**Fig. 2 | Mettl3 knockdown impairs p53 accumulation and target gene induction in response to DNA damage in oncogene-expressing primary MEFs**  
**a**, Immunoblots of *E1A;HRasV12*-expressing MEFs showing protein levels of p53 and Mettl3 in shLuc and shMettl3 shRNA-expressing cell lines. Gapdh serves as loading control. Representative immunoblots are shown from three biological replicates, and two different MEF lines per genotype were used for this experiment. The numbers indicate the p53 levels after normalization to Gapdh. **b**, qRT-PCR analysis of expression of p53 target genes after 6 hours dox (0.2  $\mu$ g/mL) in shLuc and shMettl3 shRNA-expressing cell lines, normalized to  $\beta$ -Actin. shMettl3 depicts mean of cell lines expressing either of two different shRNAs targeting Mettl3. Representative data are shown from two biological replicates each with three technical replicates and two different MEF lines per genotype were used. Data are mean of fold induction (Ratio of dox treated / untreated)  $\pm$  s.e.m. *P* values were determined by the unpaired two-tailed Student's *t*-test. \**P*<0.05, \*\**P*<0.01, \*\*\**P*<0.001.



## Figure 3 | *Mettl3* enhances p53 protein half-life by displacing Mdm2

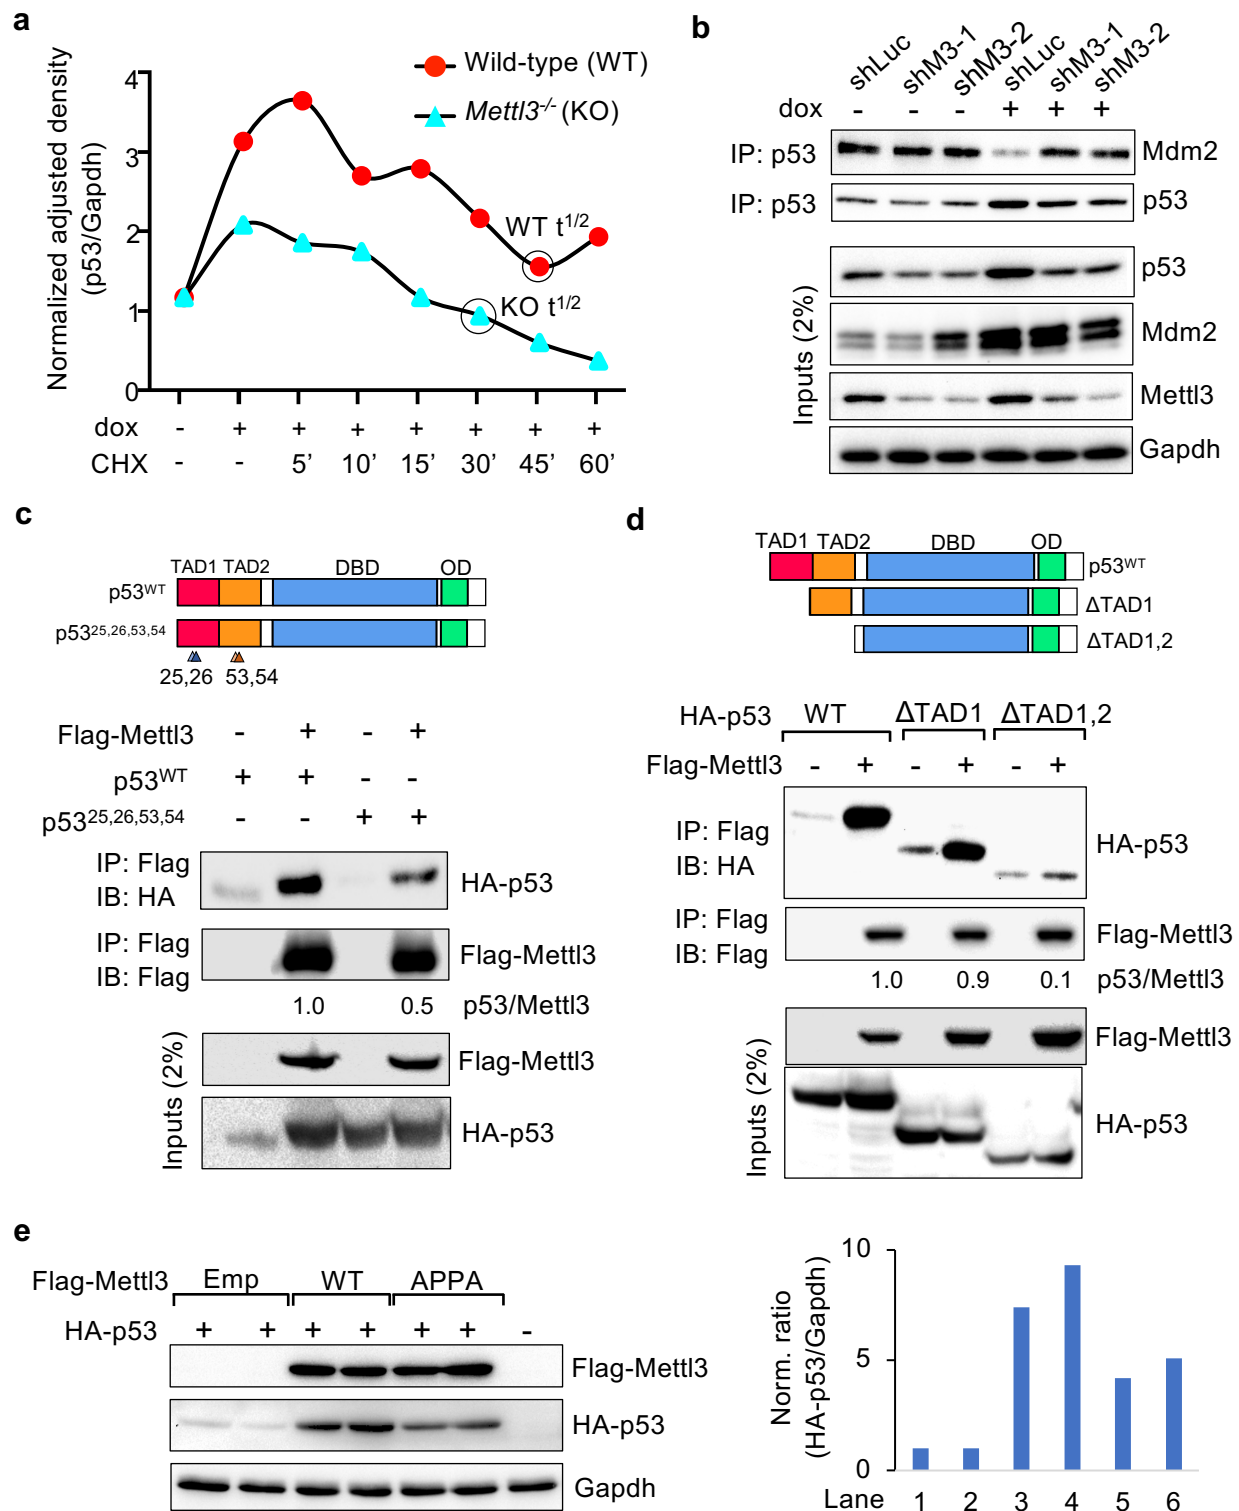

## Figure 4 | Mettl3-mediated m<sup>6</sup>A modification regulates p53 signaling pathway

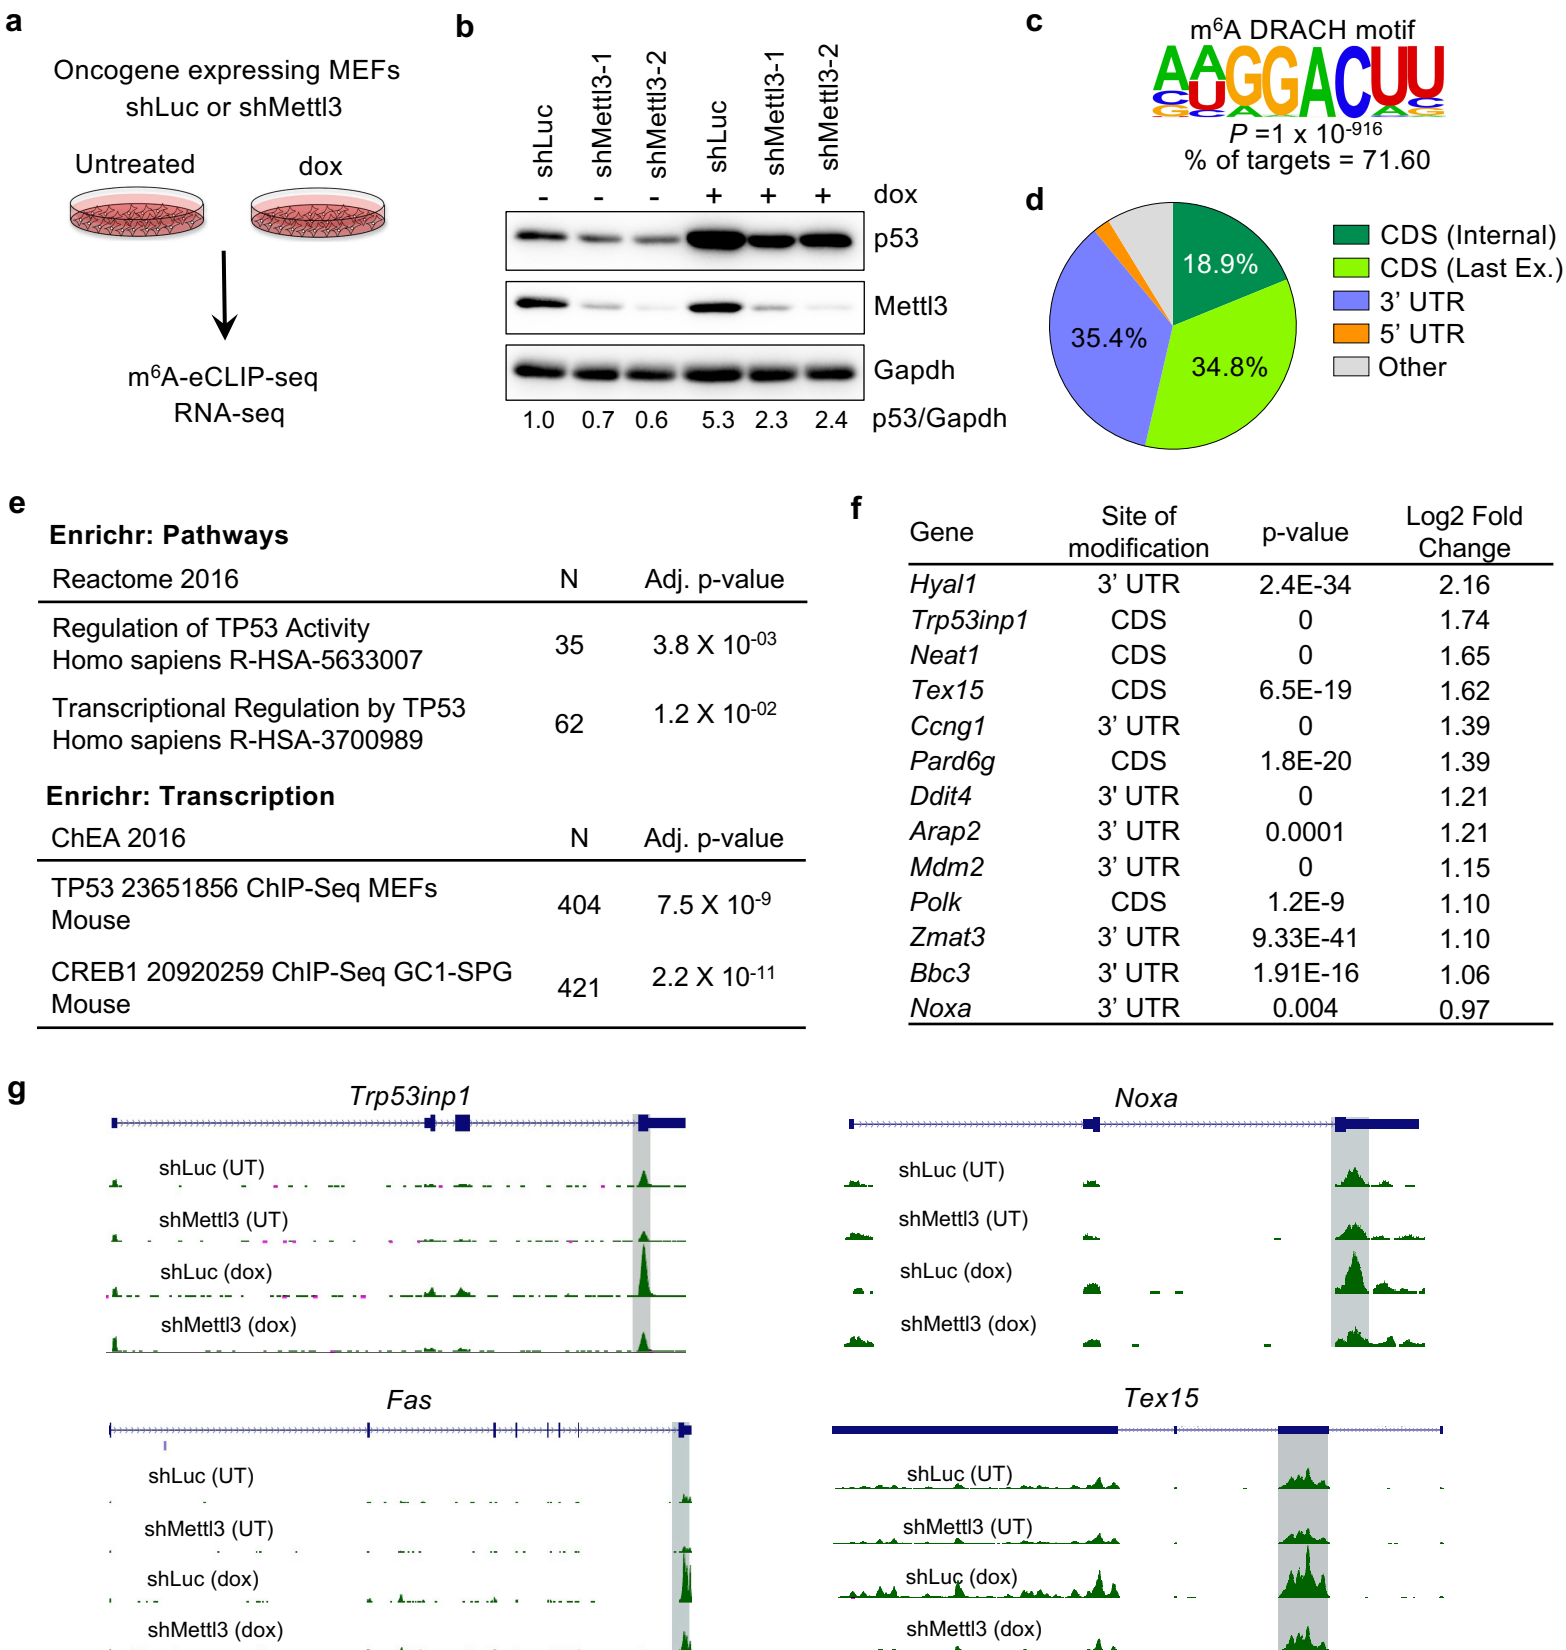

**Fig. 4 | Mettl3-mediated m<sup>6</sup>A modification regulates p53 signaling pathway.** **a**, *E1A;HRasV12*-expressing wild-type MEFs transduced with shLuc or shMettl3 hairpins were either left untreated or treated with 0.2  $\mu$ g/mL doxorubicin (dox) for 6 hours followed by m<sup>6</sup>A-eCLIP-seq and RNA-seq analysis. **b**, Immunoblots showing p53 and Mettl3 protein levels in shLuc and shMettl3 shRNA-expressing cell lines. Gapdh serves as a loading control. Representative immunoblots are shown from three biological replicates, and two different MEF lines per genotype were used for this experiment. **c**, Identification of the known consensus m<sup>6</sup>A DRACH motif in mRNAs displaying m<sup>6</sup>A modification in the presence of DNA damage, by performing *de novo* motif search with HOMER database. **d**, Pie chart of the distribution of m<sup>6</sup>A peaks enriched upon DNA damage. m<sup>6</sup>A-IP reads were normalized to the total number of reads covering the m<sup>6</sup>A residue in the input sample. **e**, Functional annotation analysis of Mettl3-dependent m<sup>6</sup>A peaks enriched upon DNA-damage using Enrichr (N=number of genes per term). **f**, Table of p53 pathway transcripts with Mettl3-dependent m<sup>6</sup>A modification under acute DNA damage showing major site of modification, *p*-values and log2 fold change for enriched m<sup>6</sup>A peaks. **g**, UCSC genome browser tracks showing RPM (reads per million) patterns of m<sup>6</sup>A-eCLIP-seq in *Trp53inp1*, *Noxa*, *Fas* and *Tex15* mRNAs in untreated or doxorubicin-treated *E1A;HRasV12* MEFs transduced with either shLuc or shMettl3 RNAs.

## Figure 5 | Mettl3 associates with chromatin of p53 target genes and enhances expression of Noxa

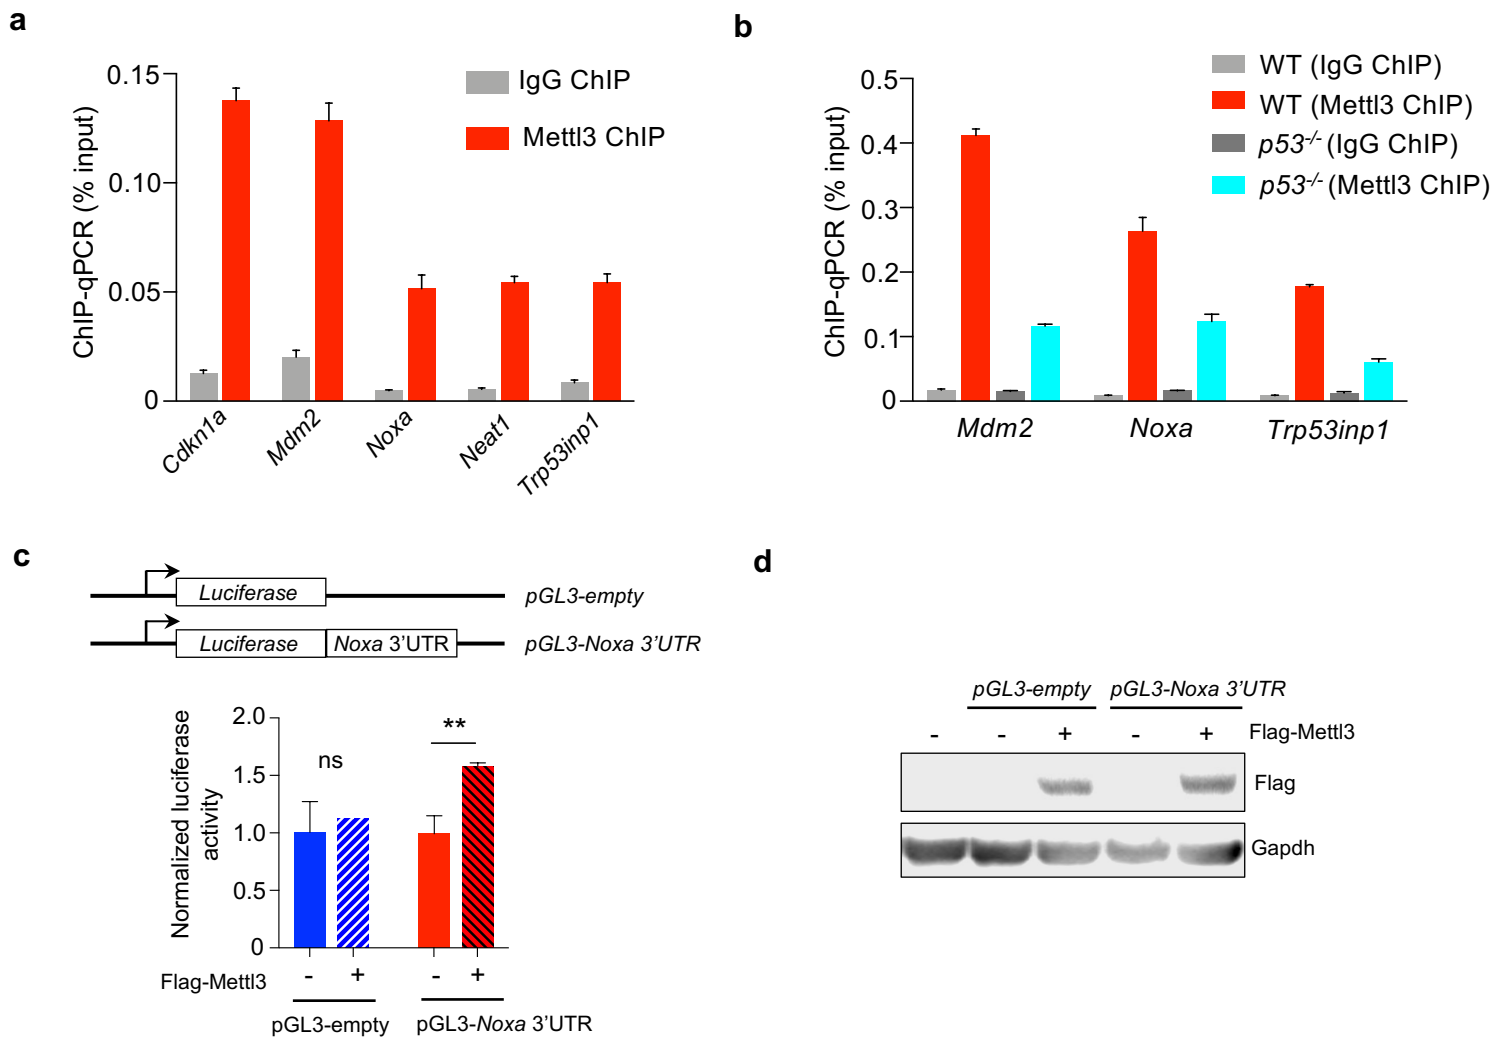

**Fig. 5 | Mettl3 associates with chromatin of p53 target genes and enhances expression of Noxa.** **a**, ChIP analysis of Mettl3 binding to p53 sites in p53 target gene loci, relative to input, in dox-treated *E1A;HRasV12* MEFs. IgG serves as a negative control antibody. Representative analysis from two biological replicates. **b**, ChIP analysis of Mettl3 binding to p53 sites in p53 target gene loci, relative to input, in dox-treated *E1A;HRasV12* wild-type and *p53*<sup>-/-</sup> MEFs. Representative analysis from two biological replicates. IgG serves as a negative control antibody. **c**, (Top) Reporter constructs expressing Firefly luciferase (Fluc) without and with the *Noxa* 3'UTR. (Bottom, left) Mean  $\pm$  s.e.m of Fluc reporter activities in Flp-In 3T3 *Mettl3*<sup>-/-</sup> cells, transfected with empty vector or Flag-Mettl3 vector, after normalization to Renilla luciferase expression and subsequently to pGL3-empty without Mettl3 ( $n=3$ ).  $P$  values were determined by unpaired, two-tailed Student's  $t$ -test. \*\* $P<0.01$ , ns = not significant. **d**, Representative immunoblot showing Flag-Mettl3 protein levels in Flp-In 3T3 *Mettl3*<sup>-/-</sup> cells. Gapdh serves as a loading control ( $n=2$ ).

## Figure 6 | *Mettl3* supports *p53*-mediated tumor suppression in mice

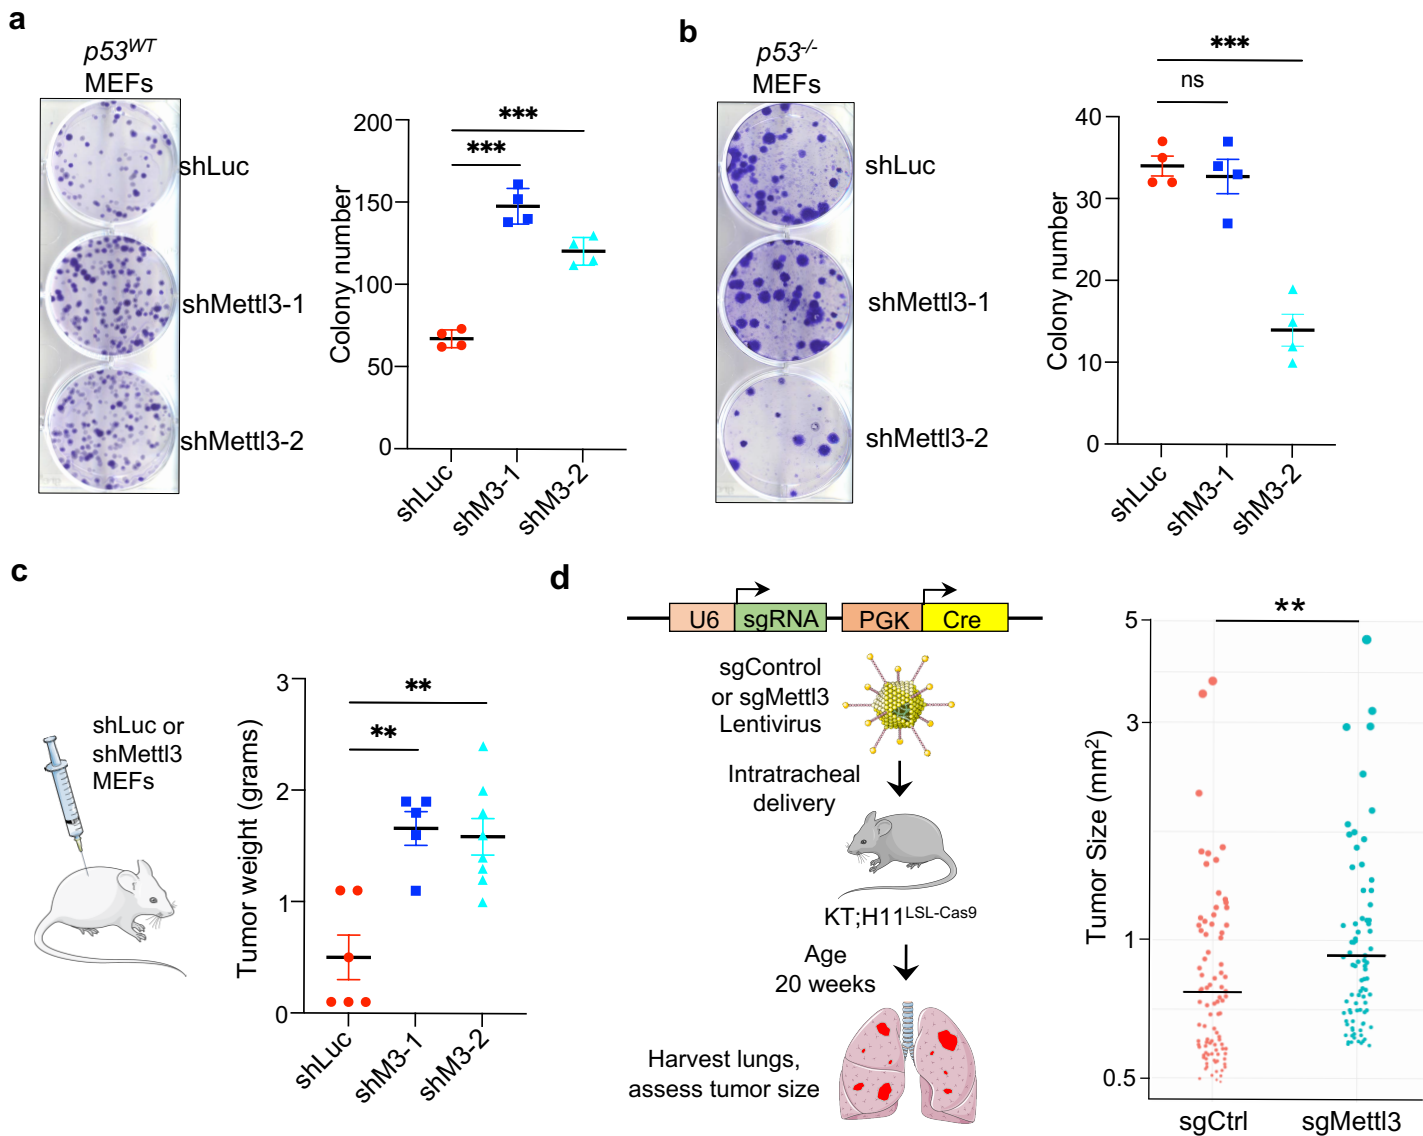

**Fig. 6 | *Mettl3* supports *p53*-mediated tumor suppression in mice.** **a,b** Low density plating assay to assess clonogenic potential of *E1A;HRasV12*-expressing wild-type MEFs (**a**) or *p53<sup>-/-</sup>* MEFs (**b**) transduced with either shLuc or shMettl3 RNAs. (Left) Crystal violet was used to stain the colonies. Representative crystal-violet stained wells are shown. (Right) Average colony number (For *p53<sup>WT</sup>* MEFs,  $n=4$ , with triplicate samples, using two different MEF lines per genotype, for *p53<sup>-/-</sup>* MEFs,  $n=2$  with triplicate samples). **c**, Average weight of *E1A;HRasV12* MEF tumors after growth *in vivo* for 32 days. Two different MEF lines were used. In **a,b,c** bar shows mean  $\pm$  s.e.m. **d**, Lentiviral vectors expressing Cre recombinase and *Mettl3* or control sgRNA were delivered intratracheally into *KT; H11<sup>LSL-Cas9</sup>* mice and tumor size of all lung tumors was assessed after 20 weeks ( $n=12$  mice per group;  $n=907$  control and 826 sgMettl3 tumors). Graph shows top 10% of all tumors in each group. Bar shows the mean for each group. *P* values were determined by unpaired, two-tailed Student's *t*-test \* $P<0.05$ , \*\* $P<0.01$ , \*\*\* $P<0.001$ , ns = not significant.

Figure 7 | Mettl3 MTC and p53 operate in a common tumor suppressive pathway in human cancers

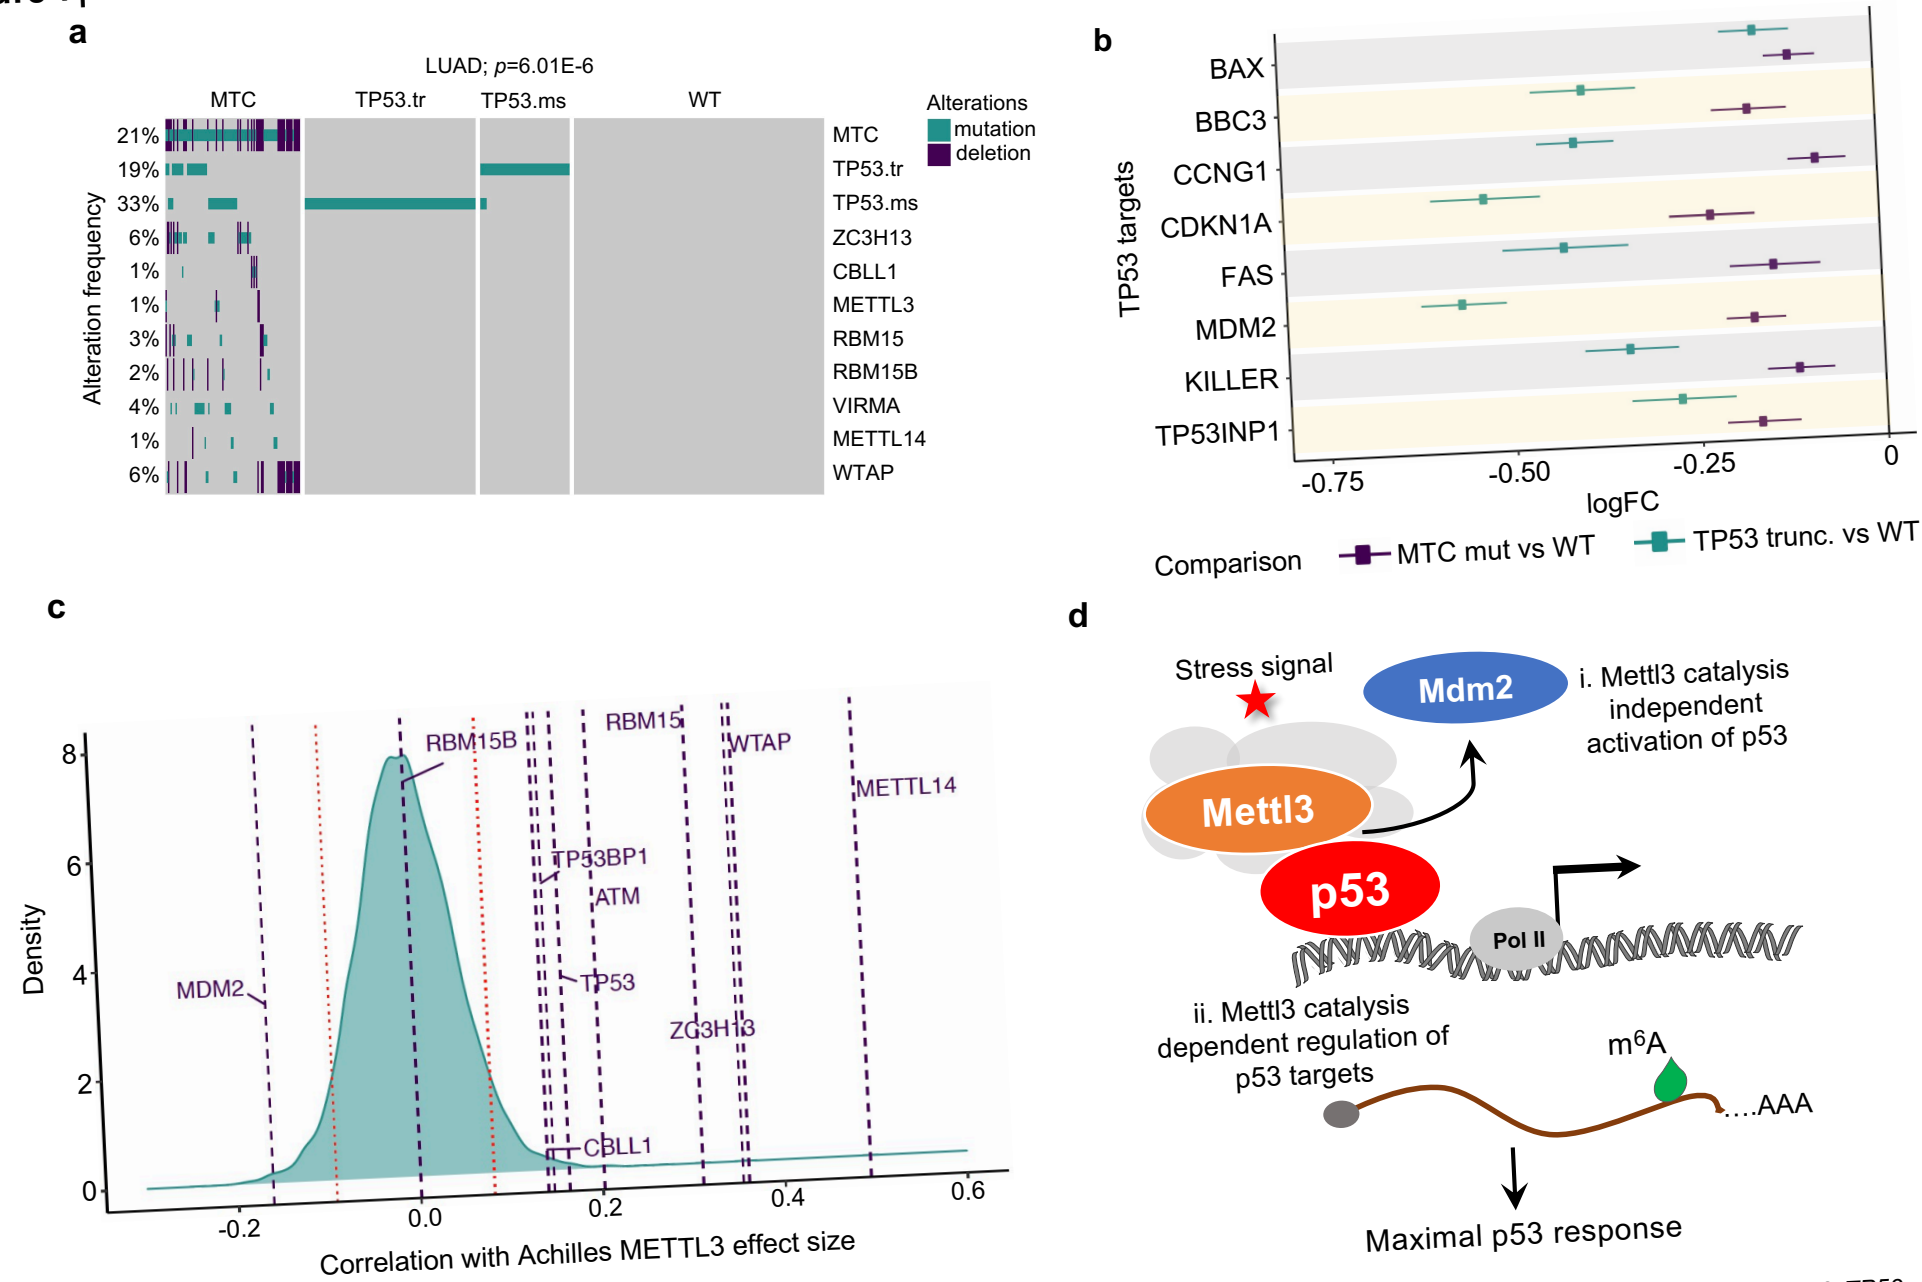

**Fig. 7 | Mettl3 MTC and p53 operate in a common tumor suppressive pathway in human cancers.** **a**, Oncoplot showing alteration frequencies of *TP53* and *METTL3* methyltransferase complex (MTC) components in human LUAD. *TP53.tr* refers to truncation mutations while *TP53.ms* refers to missense mutations in *TP53*. *P* value shows significance of DISCOVERY test unadjusted and adjusted for multiple testing. **b**, Differential expression (DE) analysis of *TP53* target genes in human cancers. Dots represent log fold change expression of select p53 targets in MTC mutant vs wild-type and *TP53* truncation mutant vs wild-type tumors. Summary represents DE in 33 TCGA cancer types. **c**, Density distribution of Pearson correlations between *METTL3* Achilles scores. Horizontal lines represent genes of interest including MTC components, *TP53*, and regulators of p53 pathway. Red bars represent the 5<sup>th</sup> and 95<sup>th</sup> quantiles of the distribution. **d**, Proposed model of *Mettl3*-MTC regulation of the p53 pathway to potentiate full p53 responses to stress signals. In response to stress signals, *Mettl3* stabilizes p53 protein in a m<sup>6</sup>A catalysis-independent manner by displacement of Mdm2 from p53 protein (i), and *Mettl3* regulates the expression of select p53 pathway transcripts by
